1 **The Arabidopsis receptor kinase STRUBBELIG regulates the response to**  
2 **cellulose deficiency**

3

4 Ajeet Chaudhary<sup>1</sup>, Xia Chen<sup>1,3</sup>, Jin Gao<sup>1,3</sup>, Barbara Leśniewska<sup>1</sup>, Richard Hammer<sup>2</sup>, Corinna Dawid<sup>2</sup>,  
5 and Kay Schneitz<sup>1\*</sup>

6

7 <sup>1</sup>Plant Developmental Biology, Life Science Center Weihenstephan, Technical University of Munich,  
8 Freising, Germany

9

10 <sup>2</sup>Chair of Food Chemistry and Molecular Sensory Science, Life Science Center Weihenstephan,  
11 Technical University of Munich, Freising, Germany

12

13 <sup>3</sup>These authors contributed equally

14

15 \*Corresponding author

16 Entwicklungsbiologie der Pflanzen

17 Wissenschaftszentrum Weihenstephan

18 Technische Universität München

19 Emil-Ramann-Str. 4

20 D-85354 Freising

21 Email: [kay.schneitz@tum.de](mailto:kay.schneitz@tum.de)

22 Tel: +49 8161 715438

23

24 Short title: SUB mediates cell wall stress signaling

25

26 Key words: cell wall, cell wall damage, cell wall integrity, isoxaben, cellulose

27

## 28 **Abstract**

29 Plant cells are encased in a semi-rigid cell wall of complex build. As a consequence,  
30 cell wall remodeling is essential for the control of growth and development as well as  
31 the regulation of abiotic and biotic stress responses. Plant cells actively sense physico-  
32 chemical changes in the cell wall and initiate corresponding cellular responses.  
33 However, the underlying cell wall monitoring mechanisms remain poorly understood.  
34 In Arabidopsis the atypical receptor kinase STRUBBELIG (*SUB*) mediates tissue  
35 morphogenesis. Here, we show that *SUB*-mediated signal transduction also regulates  
36 the cellular response to a reduction in the biosynthesis of cellulose, a central  
37 carbohydrate component of the cell wall. *SUB* signaling affects early increase of  
38 intracellular reactive oxygen species, stress gene induction as well as ectopic lignin  
39 and callose accumulation upon exogenous application of the cellulose biosynthesis  
40 inhibitor isoxaben. Moreover, our data reveal that *SUB* signaling is required for  
41 maintaining cell size and shape of root epidermal cells and the recovery of root  
42 growth after transient exposure to isoxaben. *SUB* is also required for root growth  
43 arrest in mutants with defective cellulose biosynthesis. Genetic data further indicate  
44 that *SUB* controls the isoxaben-induced cell wall stress response independently from  
45 other known receptor kinase genes mediating this response, such as *THESEUS1* or  
46 *MIK2*. We propose that *SUB* functions in a least two distinct biological processes: the  
47 control of tissue morphogenesis and the response to cell wall damage. Taken together,  
48 our results reveal a novel signal transduction pathway that contributes to the  
49 molecular framework underlying cell wall integrity signaling.

50

51

52

## 53 **Author Summary**

54 Plant cells are encapsulated by a semi-rigid and biochemically complex cell wall. This  
55 particular feature has consequences for multiple biologically important processes,  
56 such as cell and organ growth or various stress responses. For a plant cell to grow the  
57 cell wall has to be modified to allow cell expansion, which is driven by outward-  
58 directed turgor pressure generated inside the cell. In return, changes in cell wall  
59 architecture need to be monitored by individual cells, and to be coordinated across  
60 cells in a growing tissue, for an organ to attain its regular size and shape. Cell wall  
61 surveillance also comes also into play in the reaction against certain stresses,  
62 including for example infection by plant pathogens, many of which break through the  
63 cell wall during infection, thereby generating wall-derived factors that can induce  
64 defense responses. There is only limited knowledge regarding the molecular system  
65 that monitors the composition and status of the cell wall. Here we provide further  
66 insight into the mechanism. We show that the cell surface receptor STRUBBELIG,  
67 previously known to control organ development in Arabidopsis, also promotes the  
68 cell's response to reduced amounts of cellulose, a main component of the cell wall.  
69  
70

## 71 **Introduction**

72 Cell-cell communication is essential to regulate cellular behavior during many  
73 processes, including growth, development, and stress responses. In plants, the extra-  
74 cellular cell wall constitutes a central element of the underlying molecular  
75 mechanisms. It is mainly composed of carbohydrates, such as cellulose,  
76 hemicellulose, and pectin, and phenolic compounds, including lignin. Moreover, the  
77 cell wall also contains a plethora of different cell-wall-bound proteins [1,2]. It

78 imposes restrictions on cell expansion and the movement of cells and serves as a  
79 barrier to pathogen attack. The cell wall counteracts turgor-driven growth and thus  
80 cell wall remodeling is required for cell expansion [3]. Cell wall fragments released  
81 by pathogen-derived lytic enzymes can act as danger signals and elicit plant immunity  
82 responses [4]. These observations imply a necessity for plant cells to monitor cell wall  
83 integrity (CWI). Such a mechanism would sense any physico-chemical alterations that  
84 occurred in the cell wall, and elicit a corresponding compensatory and protective  
85 cellular response [5–7].

86  
87 Little is known about the molecular mechanisms that reside at the nexus of  
88 monitoring the cell wall status and the control of development and stress responses.  
89 Only a few cell surface signaling factors are presently implicated in monitoring CWI  
90 [5–7]. For example, a complex between RECEPTOR-LIKE PROTEIN44 (RLP44)  
91 and BRASSINOSTEROID INSENSITIVE1 (BRI1), the brassinosteroid receptor,  
92 specifically connects BRI1-mediated signaling to the detection of pectin  
93 modifications [8,9]. The extracellular domain of FERONIA (FER), a member of the  
94 *Catharanthus roseus* Receptor-like Kinase1-like (CrRLK1L) family of receptor  
95 kinases (RKs) originally identified on the basis of its role in sexual reproduction [10],  
96 binds pectin in vitro. *FER* is also required to prevent cell bursting upon exposure of  
97 root cells to salt [11]. Signaling mediated by ANXUR1 (ANX1) and ANX2, two other  
98 members of the CrRLK1L family, appears to contribute to monitoring cell wall  
99 integrity and the prevention of the premature burst of pollen tubes [12–15].

100

101 Plant cells also respond to changes in cellulose levels in the cell wall. Cellulose is  
102 present in the form of microfibrils that constitute the main load-bearing elements

103 resisting turgor pressure. The microfibrils are embedded in matrix polysaccharides,  
104 mainly various hemicelluloses and pectins [1,2]. Cellulose is synthesized by cellulose  
105 synthase (CESA) complexes at the plasma membrane (PM) [16]. The effects of a  
106 reduced production of cellulose on plant growth and development can be studied by  
107 analyzing mutants with defects in genes encoding CESA subunits involved in primary  
108 cell wall biosynthesis [17–21]. Alternatively, pharmacological approaches can be  
109 applied. The herbicide isoxaben is a well-characterized inhibitor of cellulose  
110 biosynthesis [22,23]. A number of findings suggest CESAs to be the direct targets of  
111 isoxaben. First, several known isoxaben-resistant mutants carry mutations near the  
112 carboxyl terminus of certain CESA subunits [24,25]. Second, isoxaben induces a  
113 rapid clearing of CESA complexes from the PM [26]. Third, isoxaben uptake or  
114 detoxification appears unaffected in resistant plants [27].

115

116 The reaction of liquid culture-grown seedlings to isoxaben-induced cellulose  
117 biosynthesis inhibition (CBI) represents a thoroughly studied stress response to cell  
118 wall damage (CWD) [28–31]. The response is sensitive to osmotic support and  
119 eventually includes the upregulation of stress response genes, the production of  
120 reactive oxygen species (ROS), an accumulation of phytohormones, such as jasmonic  
121 acid (JA), changes in cell wall composition, including the production of ectopic lignin  
122 and callose, and finally growth arrest. Similar effects were also observed when  
123 studying the phenotypes of different *cesA* mutants [17–21].

124

125 The mechanism controlling the CWD response to CBI is known to involve three RKs  
126 [28]. THESEUS1 (THE1), another member of the CrRLK1L family, was first  
127 implicated in this process [32]. *THE1* was identified based on its genetic interaction

128 with *PROCUSTE1* (*PRC1*), a gene encoding a CESA6 subunit [21]. Amongst others,  
129 cellulose-deficient *prc1* single mutants exhibit reduced hypocotyl length and ectopic  
130 lignin accumulation. In *thel prc1* double mutants these effects are ameliorated  
131 although cellulose levels remain reduced [32]. Moreover, *THE1* is required for the  
132 altered expression levels of several stress-response genes upon exposing liquid-grown  
133 seedlings to isoxaben [33]. Recently, the leucine-rich repeat (LRR)-XIIb family RK  
134 MALE DISCOVERER1-INTERACTING RECEPTOR LIKE KINASE 2/LEUCINE-  
135 RICH REPEAT KINASE FAMILY PROTEIN INDUCED BY SALT STRESS  
136 (MIK2/LRR-KISS) [34,35] and the LRR-XIII family member FEI2 [36] have also  
137 been shown to participate in the isoxaben-induced cell wall stress response [28,33,37].  
138 Genetic analysis revealed that *THE1* and *MIK2* have overlapping but also distinct  
139 functions, suggesting a complex regulation of the CBI response, with *THE1* and *MIK2*  
140 promoting this response via different mechanisms. *FEI2* appears to be part of the  
141 *THE1* genetic pathway [28].

142  
143 Tissue morphogenesis in Arabidopsis requires signaling mediated by the atypical  
144 LRR-RK STRUBBELIG (SUB). SUB, also known as SCRAMBLED (SCM), is a  
145 member of the LRR-V family of RKs and controls several developmental processes,  
146 including floral morphogenesis, integument outgrowth, leaf development and root  
147 hair patterning [38–40]. SUB represents an atypical receptor kinase, as its *in vivo*  
148 function does not require enzymatic activity of its kinase domain [38,41]. Our  
149 previous studies indicate that SUB not only localizes to the PM but is also present at  
150 plasmodesmata (PD), channels interconnecting most plant cells [42,43], where it  
151 physically interacts with the PD-specific C2 domain protein QUIRKY (QKY) [44].

152

153 Current data also associate *SUB* signaling to cell wall biology. For example, whole-  
154 genome transcriptomics analysis revealed that many genes responsive to *SUB*-  
155 mediated signal transduction relate to cell wall remodeling [45]. Moreover, Fourier-  
156 transform infrared spectroscopy (FTIR)-analysis indicated that flowers of *sub* and *qky*  
157 mutants share overlapping defects in cell wall biochemistry [46]. Thus, apart from  
158 functionally connecting RK-mediated signal transduction and PD-dependent cell-cell  
159 communication *SUB* signaling also relates to cell wall biology.

160

161 Here, we report on a further exploration of the connection between the cell wall and  
162 *SUB* function. Our data reveal a novel role for *SUB* signaling in the CBI-induced  
163 CWD response. We show that *SUB* affects several processes, such as ROS  
164 accumulation, stress gene induction as well as ectopic lignin and callose  
165 accumulation, that are initiated upon application of exogenous isoxaben. Moreover,  
166 *SUB* signaling is necessary for maintaining cell shape and recovery of root growth  
167 after transient exposure to isoxaben. Our genetic data further indicate that *SUB*,  
168 *THE1*, and *MIK2* act in different pathways and that not all contributions of *SUB* to  
169 CBI-induced CWD signaling require *QKY* function.

170

## 171 **Results**

172 In light of the connection between *SUB* signaling and cell wall biology, we set out to  
173 address if *SUB* plays a role in the seedling responses to cell wall stress. In particular,  
174 we focused on the possible role of *SUB* in the isoxaben-induced CWD response.

175

### 176 ***SUB* does not affect cellulose production**

177 We first investigated if *SUB* influences cellulose biosynthesis in seven days-old  
178 seedlings. We first analyzed transcript levels of *CESA1*, *CESA3*, and *CESA6* in wild-  
179 type and *sub*. The three genes encode the CESA isoforms present in CSCs of the  
180 primary cell wall [47,48]. We could not detect differences in transcript levels of  
181 *CESA1*, *CESA3*, and *CESA6* between *sub* and wild-type in quantitative real-time  
182 polymerase chain reaction (qPCR) experiments (Fig. 1A). Moreover, we assessed the  
183 levels of cellulose and failed to detect differences between *sub* and wild-type (Fig.  
184 1B). We could however detect a reduction in cellulose levels in *prc1-1* that was  
185 comparable to previous findings [21] (Fig. 1B). The results indicate that *SUB* does not  
186 play a central role in cellulose biosynthesis in seedlings.

187

#### 188 ***SUB* affects the isoxaben-induced CWD response**

189 We then assessed if *SUB* activity is necessary for accumulation of reactive oxygen  
190 species (ROS) in response to isoxaben-induced CWD. To this end we exposed seven-  
191 day wild-type and *sub-9* seedlings, grown on half-strength Murashige and Skoog  
192 (MS) plates containing one percent sucrose, to 600 nM isoxaben in a time-course  
193 experiment. Seedlings were monitored for up to 120 minutes, at 30 minutes intervals.  
194 Upon treatment we assessed fluorescence intensity of the intracellular ROS probe  
195 H<sub>2</sub>DCFDA in roots [49,50]. In wild-type Col-0 seedlings treated for 30 minutes with  
196 isoxaben, we noticed an increase in H<sub>2</sub>DCFDA signal compared with untreated  
197 seedlings (Fig. 2A,B). Signal intensity of the probe increased further in seedlings  
198 exposed for 60 minutes. This signal intensity remained for up to 120 minutes of  
199 continuous exposure to isoxaben. In *sub-9* seedlings we detected a slightly increased  
200 H<sub>2</sub>DCFDA signal after 60 minutes (Fig. 2A,C). However, signal intensity was  
201 noticeably reduced in comparison to wild type. In comparison to the mock control,



202 isoxaben-treated *sub-9* seedlings continued to show an enhanced signal intensity for  
203 up to 120 minutes of exposure, although the relative difference to signal levels of  
204 mock-treated seedlings was never as pronounced as in wild type. Thus in comparison  
205 to wild type, *sub-9* mutants showed a delayed onset of H<sub>2</sub>CDFDA signal appearance  
206 and an overall reduced signal intensity for the time frame analyzed. The results  
207 indicate that isoxaben causes the formation of intracellular ROS in roots of treated  
208 wild-type seedlings within 30 minutes of application. Moreover, *SUB* affects this  
209 ROS response.

210

211 Next, we tested if *SUB* activity is required for the transcriptional regulation of several  
212 marker genes, known to respond to isoxaben-induced CWD within eight hours [31].  
213 We performed quantitative real-time polymerase chain reaction (qPCR) experiments  
214 using RNA isolated from seven days-old liquid-grown seedlings that had been  
215 incubated with 600 nM isoxaben for eight hours. We observed that isoxaben-induced  
216 upregulation of *CCR1*, *CCR2*, *PDF1.2*, and *TCH4* was attenuated in *sub-9* mutants  
217 compared to wild type (Fig. 2D). We did not detect a significant alteration in the  
218 upregulation of other tested marker genes, including *VSP1*, *FRK1*, *CYP81F2*, *TIP2;3*,  
219 and *RBOHD*, in *sub-9* seedlings. In wild type, upregulation of *CCR1* and *PDF1.2*  
220 expression was already detected upon four hours of isoxaben treatment [31]. We  
221 observed that expression levels of the two genes were significantly reduced in *sub-9*  
222 upon a four-hour exposure to isoxaben (Fig S1). These results indicate that *SUB* is  
223 required for the isoxaben-induced upregulation of expression of several marker genes.  
224  
225 The seedlings' response to isoxaben also includes the accumulation of the  
226 phytohormone JA [31]. We thus tested if *SUB* affects the isoxaben-induced

227 production of JA in seven days-old liquid-grown seedlings that had been incubated in  
228 600 nM isoxaben for seven hours. We found that JA accumulation appeared largely  
229 unaffected in *sub-9* or *sub-21* mutants while the two overexpressing lines showed  
230 strongly diminished JA levels following isoxaben treatment (Fig. 2E). The results  
231 indicate that *SUB* is not required for isoxaben-induced JA accumulation. The  
232 observation that the phenotypes of the loss-of-function and overexpressing mutants  
233 are not easy to reconcile with each other renders an interpretation of the effects seen  
234 in the *SUB* overexpressing lines difficult. Thus, their biological relevance needs to be  
235 assessed in further experiments.

236

237 Isoxaben-induced CBI eventually results in the alteration of cell wall biochemistry as  
238 evidenced by the ectopic accumulation of lignin and callose [31]. To investigate if  
239 *SUB* affects lignin biosynthesis, we estimated lignin accumulation in roots using  
240 phloroglucinol staining after exposing six-day-old liquid-grown seedlings to 600 nM  
241 isoxaben for 12 hours. We observed reduced phloroglucinol staining in the root  
242 elongation zone of *sub-1* seedlings in comparison to wild type *Ler* indicating less  
243 ectopic lignin production (Fig. 3A,B). We also noticed reduced phloroglucinol signal  
244 in *sub-9* seedlings (Col-0 background) although the effect was less prominent.  
245 However, in our hands Col-0 wild-type plants exhibited an overall weaker  
246 phloroglucinol staining indicating that isoxaben-induced lignin accumulation does not  
247 occur to the same level as in *Ler* (Fig. 3A,B). We could detect increased  
248 phloroglucinol staining in two out of three *pUBQ::SUB::mCherry* lines (L1, O3) (Fig.  
249 3A,B).

250

251 Isoxaben-treatment for 24 hours results in the formation of callose in cotyledons of  
252 wild-type seedlings [31]. Thus, we tested if *SUB* is required for this process as well.  
253 To this end we transferred seven days-old plate-grown seedlings to liquid medium  
254 without isoxaben for 12 hours. Subsequently, medium was exchanged, and seedlings  
255 were kept in 600 nM isoxaben for another 24 hours followed by callose detection  
256 using aniline blue staining [51]. As expected, we observed prominent aniline blue  
257 staining in cotyledons of *Ler* and *Col* wild-type seedlings upon isoxaben treatment  
258 (Fig. 3C,D). By contrast, we detected strongly reduced aniline blue staining in  
259 cotyledons of isoxaben-treated *sub-1* and *sub-4* (both in *Ler*) as well as *sub-9* and *sub-*  
260 *21* (both in *Col*). In contrast, and similar to the phloroglucinol staining described  
261 above, we detected stronger aniline blue staining in *SUB* overexpressors (lines L1,  
262 O3) (Fig. 3C,D).

263

264 Taken together, the results indicate that *SUB* is required for the isoxaben-induced  
265 formation of lignin and callose in seedlings.

266

### 267 **The *SUB*-mediated CBI response is sensitive to sorbitol**

268 The isoxaben-induced CWD response is sensitive to turgor pressure, as indicated by  
269 the suppression of lignin or callose accumulation in the presence of osmotica, such as  
270 sorbitol [28,30,31]. To test if *SUB* affects a turgor-sensitive CBI response we  
271 compared isoxaben-induced accumulation of lignin and callose in six days-old *Col-0*,  
272 *sub-9*, and *pUBQ::SUB:mCherry* seedlings in co-treatments with 600 nM isoxaben  
273 and 300 mM sorbitol (Fig. 4A-C). We observed that sorbitol suppressed lignin and  
274 callose accumulation in all tested genotypes, including *SUB:mCherry* overexpressing  
275 lines, which show hyperaccumulation of lignin or callose in the absence of sorbitol.

276

277 ***SUB* attenuates isoxaben-induced cell swelling and facilitates root growth**

278 **recovery**

279 Next, we assessed the biological relevance of *SUB* in the isoxaben-induced CWD  
280 response. Exposure of seedlings to isoxaben eventually results in the shortening and  
281 swelling of cells of the root epidermis, possibly a result of reduced microfibril  
282 formation in the cell wall [28]. We transferred six days-old plate-grown seedlings into  
283 a mock solution or a solution containing 600 nM isoxaben for up to seven hours. We  
284 then assessed the timing of the initial appearance of altered cellular morphology of  
285 root epidermal cells. In addition, we monitored the severity of the phenotype. We  
286 focused on cells of the elongation zone that bordered the root meristem. Notably, we  
287 did not observe any obvious morphological alterations in mock-treated wild-type or  
288 mutant seedlings (Fig. 5). In Col-0 wild-type seedlings cell shortening and swelling  
289 first became noticeable during the five to six-hour interval preceding treatment (Fig.  
290 5) (44/96 seedlings total, n = 4), as reported previously [28]. Upon isoxaben  
291 application to *sub-9* or *sub-21* seedlings, however, similar cellular alterations were  
292 already detected at the three to four-hour interval post treatment initiation (*sub-9*:  
293 23/57, n = 2; *sub-21*: 20/46, n = 2). In addition, *sub* mutants exhibited more  
294 pronounced cellular alterations after seven hours of isoxaben treatment in comparison  
295 to wild type (Fig. 5).

296

297 In wild-type seedlings, a 24-hour exposure to isoxaben results in a temporary stop of  
298 root growth followed by a rapid recovery [28]. We tested the role of *SUB* in root  
299 growth recovery upon a 24 hour-treatment with isoxaben. Six-day-old wild-type and  
300 mutant seedlings grown on plates were transferred onto media containing 600 nM

301 isoxaben for 24 hours, then moved to fresh plates lacking isoxaben. Seedlings were  
302 then monitored for continued root growth at 24 hour intervals, for a total of 72 hours  
303 (Table 1). As control, we used the *ixr2-1* mutant, which is resistant to isoxaben due to  
304 a mutation in the *CESA6* gene [24,25,52]. We observed that 98 percent of *ixr2-1*  
305 seedlings recovered root growth already within 24 hours, indicating that treatment did  
306 not generally impact the seedlings' ability to recover root growth. We then tested  
307 wild-type seedlings. We noticed that 46 percent of *Ler* and 39 percent of *Col*  
308 seedlings had resumed root growth after 24 hours. By 72 hours, 86 percent of *Ler* and  
309 90 percent of *Col* seedlings had recovered root growth. In contrast, a significantly  
310 reduced fraction of *sub-1* and *sub-4* mutants had resumed root growth when compared  
311 to wild-type *Ler* (Table 1). The *sub-9* and *sub-21* mutants also showed reduced root  
312 growth recovery in comparison to *Col* although *sub-21* appeared less affected than  
313 *sub-9*. Importantly, *ixr2-1 sub-9* mutants behaved identical to *ixr2-1* single mutants at  
314 all time points scored. These findings indicate that *ixr2-1* is epistatic to *sub-9* and that  
315 the observed isoxaben-induced decrease in root growth recovery in *sub-9* mutants  
316 relates to the herbicide.

317

318 Taken together, the results suggest that *sub* mutants are hypersensitive to isoxaben  
319 treatment and that *SUB* facilitates root growth recovery, and represses cell size and  
320 shape changes in root epidermal cells during the isoxaben-induced CWD response.

321

### 322 ***SUB* attenuates root growth in *prc1-1***

323 *PRCI* encodes the *CESA6* subunit of cellulose synthase [21] and *prc1* loss-of-  
324 function mutants show reduced cellulose levels [21] (Fig. 1B). In addition, *prc1-1*  
325 mutants are characterized by a reduced elongation of etiolated hypocotyls and roots

326 [21]. To test if *SUB* also affects a biological process in a scenario where cellulose  
327 reduction is induced genetically we compared root length in *sub-9*, *sub-21*, and *prc1-1*  
328 single and *sub-9 prc1-1* double mutants (Fig. 6A,B). We found that root length of  
329 *sub-9* or *sub-21* did not deviate from wild type while root length of *prc1-1* was  
330 markedly smaller in comparison to wild type, confirming previous results [21].  
331 Interestingly, however, we observed that *sub-9 prc1-1* exhibited a significantly longer  
332 root than *prc1-1* though *sub-9 prc1-1* roots were still notably smaller than wild type  
333 roots. The results indicate that *SUB* contributes to root growth inhibition in *prc1-1*.

334

### 335 ***SUB* and *QKY* contribute differently to the CBI response**

336 Evidence suggests that a protein complex including *SUB* and *QKY* is important for  
337 *SUB*-mediated signal transduction regulating tissue morphogenesis [44,53,54]. Thus,  
338 we wanted to explore if *QKY* is also required for the isoxaben-induced CWD response  
339 in seedlings. We first investigated if *QKY* affects the early isoxaben-induced changes  
340 in intracellular ROS levels by assessing H<sub>2</sub>CDFDA fluorescence in root tips of *qky-11*  
341 seedlings that were treated with 600 nM isoxaben. We did not observe a difference in  
342 signal intensity between mock and isoxaben-treated *qky-11* (Fig. 7A). Moreover,  
343 signal intensity was similar to wild type (Fig. 2B) indicating that *QKY* does not  
344 contribute to altered intracellular ROS levels in root tips of treated seedlings in a  
345 noticeable fashion. We then tested if *QKY* promotes isoxaben-induced marker gene  
346 expression in liquid-grown seedlings. Using qPCR we observed that *SUB* and *QKY*  
347 affect a similar set of marker genes (Fig. 7B). Next, we assessed isoxaben-induced  
348 lignin accumulation in wild-type and *qky* seedlings by phloroglucinol staining. We  
349 noticed reduced staining in *qky-8* and *qky-11* mutants compared to wild type (Fig.  
350 7C,D). Again, the effect was less obvious in Col-0. In addition, we noticed that *qky-*

351 *11* did not affect the absence of lignin accumulation in seedlings simultaneously  
352 treated with isoxaben and sorbitol (Fig. 4A). We also investigated the role of *QKY* in  
353 isoxaben-induced callose deposition by scoring the aniline blue-derived signal in  
354 cotyledons. In contrast to *sub* mutants, however, we did not observe a significant  
355 difference in signal strength between *qky-8*, *qky-11*, and wild type (Fig. 7E,F).  
356 Regarding isoxaben-induced JA accumulation we found that *qky-11* seedlings did not  
357 noticeable deviate from *sub* (Fig. 2E). We also analyzed isoxaben-induced shortening  
358 and swelling of root epidermal cells in *qky-11* mutants (Fig. 4). We noticed the first  
359 defects in a four to five hour interval and thus about an hour later than in *sub* mutants  
360 (37/63, n = 3). Cell swelling after seven hours exposure to isoxaben was prominent in  
361 *qky-11* but less severe in comparison to *sub-9* (Fig. 4). Finally, we investigated root  
362 growth recovery after transient isoxaben application. We observed that *qky-8* and *qky-*  
363 *11* mutants did not significantly deviate from wild type (Table 1).

364

365 Taken together, the results indicate that *QKY* and *SUB* contribute to the isoxaben-  
366 mediated induction of an overlapping set of marker genes as well as to lignin  
367 accumulation. Moreover, *QKY* also plays a role in the suppression of isoxaben-  
368 induced alterations in cell morphology in the root epidermis. However, the results also  
369 imply that *QKY* is not required for isoxaben-induced early ROS accumulation in root  
370 tips as well as callose accumulation in cotyledons and does not affect root growth  
371 recovery after transient exposure to isoxaben.

372

### 373 ***SUB* and *THE1* share partially overlapping functions**

374 *THE1* is a central regulator of the isoxaben-induced CBI response [28,33,37]. Our  
375 data indicate that *SUB* and *THE1* have overlapping but also distinct functions in this

376 process. For example, *SUB* and *THE1* control isoxaben-induced lignin accumulation  
377 in roots (Fig. 3) [28,33]. However, in contrast to *THE1*, *SUB* was not shown to affect  
378 *FRKI* induction by isoxaben (Fig. 2D) [33]. We also found that root growth recovery  
379 of *the1-1* seedlings upon transient exposure to isoxaben did not deviate from wild  
380 type (Table 1). Moreover, we failed to detect an effect of *THE1* on root growth  
381 inhibition in *prc1-1*, while *SUB* contributes to this process (Fig. 6). We therefore  
382 explored further the relationship between *THE1* and *SUB*.  
383  
384 *THE1* contributes to the reduction of hypocotyl length of cellulose-diminished *prc1-1*  
385 seedlings grown in the dark as evidenced by the partial recovery of hypocotyl  
386 elongation in *the1 prc1* double mutants [32]. We compared *sub-9 prc1-1* to *the1-1*  
387 *prc1-1* with respect to hypocotyl elongation in six-day-old etiolated seedlings and root  
388 length in seven-day-old light-grown seedlings (Fig. 8). We observed strongly reduced  
389 hypocotyl elongation in *prc1-1* in comparison to wild type and a significant  
390 suppression of this reduction in *the1-1 prc1-1* double mutants (Fig. 8A,B), as  
391 described earlier [32]. In contrast, hypocotyl length in *sub-9* mutants was not  
392 decreased, nor was there a partial reversal of reduced hypocotyl elongation in *sub-9*  
393 *prc1-1* double mutants (Fig. 8A,B). The results indicate that *SUB* does not affect  
394 hypocotyl elongation in etiolated wild-type or *prc1-1* seedlings.  
395  
396 Finally, we assessed the role of *THE1* in isoxaben-induced early ROS accumulation in  
397 root tips. We noticed no difference in H<sub>2</sub>CDFDA signal intensity when comparing  
398 *the1-1* seedlings that had been treated with either mock or isoxaben for 30 minutes  
399 (Fig. 8C). By contrast, isoxaben-induced reporter signal in the root tip became  
400 stronger than the mock-mediated signal at the 60 minutes time point (Fig. 8C).



401 Overall the results resemble the findings obtained with *sub-9* mutants (Fig. 2C)  
402 although the response may be slightly less affected in *the1-1* in comparison to *sub-9*.

403

404 In summary, *SUB* and *THE1* are required for ROS and lignin accumulation in roots  
405 and show partial overlap with respect to stress marker gene induction. *SUB* and *THE1*  
406 show opposite effects on growth inhibition of roots and hypocotyls in *prc1* mutants  
407 and their functions differ with respect to root growth recovery.

408

## 409 **Discussion**

410 Cell wall signaling during plant development and stress responses relies on complex  
411 and largely unknown signaling circuitry [5–7,29,55]. Only a few RKs, including  
412 THE1, MIK2, and FEI2, have so far been shown to play a major role in CBI-induced  
413 CWD signaling [28,32,33,37]. Our data establish *SUB* signal transduction as a novel  
414 component in the molecular framework mediating the CWD response.

415

416 To date, published evidence has attributed a developmental role to *SUB*, particularly  
417 in the control of tissue morphogenesis and root hair pattern formation [38–40,45,56].  
418 The evidence provided in this work identifies a novel role for *SUB* in CWD signaling.  
419 Application of isoxaben results in reduced levels of cellulose [22,23]. Our results  
420 indicate that *SUB* affects multiple aspects of the isoxaben-induced CWD response.  
421 The observation that *sub-9* partially suppresses reduced root length exhibited by *prc1-*  
422 *1* indicates that *SUB* also mediates a CWD response that is caused by a genetic  
423 reduction in cellulose content. Thus, the collective data support the notion that the  
424 origin of the CWD relates to the reduced production of cellulose, a major

425 carbohydrate component of the cell wall, and that *SUB* contributes to the  
426 compensatory cellular response to this type of cell-wall-related stress.

427

428 The data indicate that *SUB* already affects the early response to isoxaben-induced  
429 CWD, in particular ROS production. Previous results had revealed that the isoxaben-  
430 induced CWD response involves *THE1*-dependent ROS production [31,57]. In  
431 luminol-based extracellular ROS assays involving entire seedlings ROS production  
432 could be detected after around three to four hours following the application of  
433 isoxaben [57]. We used the intracellular ROS probe H<sub>2</sub>CDFDA and a microscope-  
434 based method that enabled tissue-level resolution. H<sub>2</sub>CDFDA has for example been  
435 used to assess basal intracellular ROS levels when studying *GLYCERALDEHYDE-3-*  
436 *PHOSPHATE DEHYDROGENASE (GAPDH)* genes and root hairs [49,50]. Our time-  
437 course data indicate that isoxaben induces the formation of intracellular ROS in the  
438 root meristem within 30 minutes. To our knowledge the isoxaben-dependent change  
439 in H<sub>2</sub>CDFDA fluorescence signal represents the earliest available marker for the  
440 isoxaben-induced CWD response. It also indicates that this response occurs much  
441 earlier than previously appreciated.

442

443 The results suggest that *SUB* is required for full induction of several marker genes,  
444 such as *CCR1*, *PDF1.2*, or *TCH4*. Moreover, the data indicate that *SUB* promotes  
445 CBI-induced accumulation of lignin and callose. In addition, *SUB* does not obviously  
446 influence the reduced lignin and callose state the results from double application of  
447 sorbitol and isoxaben. This result indicates that *SUB* mediates an osmosensitive CWD  
448 response. It has been proposed that a mechanical stimulus initiates the CWD response  
449 with the reduction in cellulose and corresponding weakening of the cellulose

450 framework counteracting turgor pressure. In this model, a displacement or distortion  
451 of the plasma membrane relative to the cell wall could take place [28,58–61]. We  
452 speculate that *SUB* signaling likely involves as yet unknown mechano-sensitive  
453 factors. The combined results fulfil the criteria that have been established for a CBI-  
454 induced CWD response [28,31].  
455  
456 Interestingly, different loss-of-function (*sub-1*, *sub-9*, *sub-21*) or gain-of-function  
457 (*pUBQ::SUB:mCherry*) mutants show reciprocal effects regarding lignin and callose  
458 accumulation, with *sub* mutants showing less and several independent  
459 *pUBQ::SUB:mCherry* lines exhibiting higher levels of lignin or callose, respectively,  
460 upon application of isoxaben. Based on this evidence, we propose the model that *SUB*  
461 represents an important genetic regulator of isoxaben-induced lignin and callose  
462 accumulation and thus cell wall composition.  
463  
464 Several lines of evidence indicate that *SUB* plays a biologically relevant role in CWD  
465 signaling initiated by a reduction in cellulose content. Firstly, *SUB* attenuates  
466 isoxaben-induced cell bulging in the epidermal cells of the meristem-transition zone  
467 boundary of the root. Secondly, *SUB* facilitates root growth recovery upon transient  
468 exposure of seedlings to isoxaben. Thirdly, *SUB* is involved in root growth inhibition  
469 that is a consequence of a genetic reduction of cellulose content. In particular, root  
470 length of *sub-9 prc1-1* double mutant seedlings is less diminished in comparison to  
471 the root length of *prc1-1* single mutant seedlings. The results imply that *SUB*  
472 contributes to a compensatory response that counteracts the cellular and growth  
473 defects caused by reduced cellulose synthesis and further support the notion that *SUB*  
474 plays a central role in CBI-induced CWD signaling.

475

476 How does SUB relate to other known RK genes mediating the response to CBI-  
477 induced cell wall stress, such as *THE1* and *MIK2*? *SUB*, *THE1*, and *MIK2* all promote  
478 isoxaben-induced ectopic lignin production. The three genes are also required for full  
479 induction of certain stress marker genes. However, while *THE1* and *MIK2* control  
480 *FRK1* expression, and *MIK2* also affects the expression of *CYP81F2* [33], our data  
481 indicate that *SUB* is not required for the induction of these two genes. In addition,  
482 *THE1* and *MIK2* are necessary for isoxaben-induced JA accumulation [28,33,57], a  
483 process that apparently does not require *SUB* function. We also did not observe an  
484 effect of *THE1* on root growth recovery upon transient exposure to isoxaben. In  
485 addition, we did not find an altered hypocotyl length of *sub-9 prc1-1* in comparison to  
486 *the1-1* indicating that *SUB* does not affect hypocotyl growth inhibition in etiolated  
487 *prc1-1* seedlings, in contrast to *THE1* [32]. At the same time, our data suggest that  
488 *SUB* contributes to root growth inhibition in *prc1-1*. However, our evidence does not  
489 support a function for *THE1* in this process, as root length of *the1-1 prc1-1* double  
490 mutants did not deviate from the root length observed for *prc1-1* single mutants. This  
491 finding also implies that the lignin accumulation in the mature root parts of *prc1-1*  
492 (suppressed in *prc1-1 the1-1* double mutants) [32] does not correlate with root growth  
493 inhibition. Finally, we did not observe the left-hand root skewing in *sub* seedlings that  
494 is characteristic for *mik2* mutants [33], and we failed to observe floral defects in *mik2*  
495 or *the1* mutants. Taken together, the data suggest that *SUB* has both overlapping and  
496 distinct functions with *THE1* and *MIK2*. As the most parsimonious explanation of our  
497 results, we propose that *SUB* contributes to CBI-induced cell wall damage signaling  
498 independently from *THE1* and *MIK2* signaling, however the signaling pathways

499 downstream of the different cell surface receptor kinases eventually partially converge  
500 and contribute to a subset of overlapping downstream responses.

501

502 *QKY* represents a central genetic component of *SUB*-mediated signal transduction  
503 during tissue morphogenesis and root hair patterning [45]. The expression pattern of  
504 *QKY* and *SUB* fully overlap [44] and present evidence supports the notion that *SUB*  
505 and *QKY* are part of a protein complex with *QKY* likely acting upstream to, or in  
506 parallel with, *SUB* [44,53,54]. However, genetic and whole-genome transcriptomic  
507 data suggested that *SUB* and *QKY* also play distinct roles during floral development  
508 [45]. The data presented in this study reveal that *SUB* and *QKY* both contribute to  
509 CBI-induced CWD signaling. Similar to *SUB* *QKY* is required for full induction of the  
510 same marker genes and for lignin accumulation. Moreover, *QKY* is also necessary for  
511 the prevention of cell bulging in the epidermal cells of the meristem-transition zone  
512 boundary of the root although the weaker phenotype of *qky-11* mutants indicates a  
513 lesser requirement for *QKY* in comparison to *SUB*. However, our data also indicate  
514 that *QKY* is not required for early ROS accumulation, ectopic callose accumulation,  
515 and root growth recovery as we found these three processes to be not noticeably  
516 affected in *qky* mutants. Thus, these data provide genetic evidence that the functions  
517 of *SUB* and *QKY* do not completely overlap and that *SUB* exerts CWD signaling  
518 functions that are independent of *QKY*. One way to rationalize these findings is to  
519 assume that *SUB* can also function in isolation or in protein complexes or pathways  
520 that do not involve *QKY*.

521

522 The diverse functions of *SUB* in development and the CWD response are likely to be  
523 achieved through participation in different signaling pathways. It is not uncommon

524 that RKs play important roles in several biological processes. In this respect, SUB  
525 resembles for example the RK BRASSINOSTEROID INSENSITIVE 1-  
526 ASSOCIATED KINASE 1 (BAK1) / SOMATIC EMBRYOGENESIS RECEPTOR  
527 KINASE 3 (SERK3), which functions in growth, development, and plant defense  
528 [62,63]. BAK1 interacts with a range of different LRR-RKs, including FLAGELLIN  
529 SENSING 2 (FL2) and BRASSINOSTEROID INSENSITIVE 1 (BRI1), and the  
530 discrimination between the growth and immunity functions of BAK1 was recently  
531 shown to rely on phosphorylation-dependent regulation [64,65]. In light of these  
532 considerations it is reasonable to propose that SUB is a member of different receptor  
533 complexes. As kinase activity of SUB is not required for its function [38] SUB could  
534 act as a scaffold around which the components of the various complexes assemble. A  
535 scaffold role has for example been proposed for the RK AtCERK1/OsCERK1 in  
536 chitin signaling or the RK FER in immune signaling [66,67]. It will be interesting to  
537 explore this notion in future work.

538

539

## 540 **Materials and Methods**

### 541 **Plant work, plant genetics and plant transformation**

542 *Arabidopsis thaliana* (L.) Heynh. var. Columbia (Col-0) and var. Landsberg (*erecta*  
543 mutant) (*Ler*) were used as wild-type strains. Plants were grown as described earlier  
544 [45]. The *sub-1*, *qky-8* (all in *Ler*), and the *sub-9* and *qky-11* mutants (Col) have been  
545 characterized previously [38,41,44,45]. The *prc1-1* [21], *the1-1* [32], and *ixr2-1* [24]  
546 alleles were also described previously. The *sub-21* (Col) allele was generated using a  
547 CRISPR/Cas9 system in which the egg cell-specific promoter pEC1.2 controls Cas9  
548 expression [68]. The single guide RNA (sgRNA) 5'-

549 TAATAACTTGTATATCAACTT-3' binds to the region +478 to +499 of the *SUB*  
550 coding sequence. The sgRNA was designed according to the guidelines outlined in  
551 [69]. The mutant carries a frameshift mutation at position 495 relative to the *SUB* start  
552 AUG, which was verified by sequencing. The resulting predicted short SUB protein  
553 comprises 67 amino acids. The first 39 amino acids correspond to SUB and include its  
554 predicted signal peptide of 29 residues, while amino acids 40 to 67 represent an  
555 aberrant amino acid sequence. The pUBQ::gSUB:mCherry plasmid used to generate  
556 the *SUB* overexpression lines L1 and O3 was generated previously [44]. Wild-type,  
557 and *sub* mutant plants were transformed with different constructs using  
558 *Agrobacterium* strain GV3101/pMP90 [70] and the floral dip method [71]. Transgenic  
559 T1 plants were selected on Kanamycin (50 µg/ml), Hygromycin (20 µg/ml) or  
560 Glufosinate (Basta) (10 µg/ml) plates and transferred to soil for further inspection.

561

#### 562 **Cellulose quantification**

563 Seedlings were grown on square plates with half strength MS medium and 0.3%  
564 sucrose supplemented with 0.9% agar for seven days. Cellulose content was measured  
565 following the Updegraff method essentially as described [72,73], with minor  
566 modifications as outlined here. Following the acetic nitric treatment described in [72],  
567 samples were allowed to cool at room temperature and transferred into 2 ml  
568 Eppendorf safety lock tubes. Samples were then centrifuged at 14000 rpm at 15°C for  
569 15 min. The acetic nitric reagent was removed carefully without disturbing the  
570 pelleted material at the bottom of the tube. 1 ml of double-distilled H<sub>2</sub>O was added,  
571 and the sample was left on the bench for 10 min at room temperature followed by  
572 centrifugation at 14000 rpm at 15°C for 15 min. After aspirating off the H<sub>2</sub>O 1 ml  
573 acetone was added and the samples were incubated for another 15 min, followed by

574 centrifugation at 14000 rpm at 15°C for 15 min. Afterwards acetone was removed,  
575 and samples were air-dried overnight. Then the protocol was continued as described  
576 in [72].

577

### 578 **PCR-based gene expression analysis**

579 For quantitative real-time PCR (qPCR) of *CesA* and stress marker genes 35 to 40  
580 seedlings per flask were grown in liquid culture under continuous light at 18°C for  
581 seven days followed by treatment with mock or 600 nM isoxaben for eight hours or  
582 on plates (21°C, long-day conditions). With minor changes, RNA extraction and  
583 quality control were performed as described previously [74]. cDNA synthesis, qPCR,  
584 and analysis were done essentially as described [75]. Primers are listed in  
585 Supplemental Table 1.

586

### 587 **ROS, lignin, and callose staining**

588 Intracellular ROS accumulation in root meristems was estimated using the H<sub>2</sub>DCFDA  
589 fluorescent stain essentially as described [50]. Seeds were grown on square plates  
590 with half strength MS medium and 1% sucrose supplemented with 0.9% agar. The  
591 seeds were stratified for two days at 4°C and incubated for seven days at 22°C under  
592 long day conditions, at a 10 degree inclined position. Seven days-old seedlings were  
593 first transferred into multi-well plates containing half strength liquid MS medium  
594 supplemented with 1% sucrose for two hours. Then medium was exchanged with  
595 liquid medium containing either DMSO (mock) or 600nM isoxaben without  
596 disturbing seedlings. 10 min prior to each time point seedlings were put in the dark  
597 and the liquid medium was supplemented with 100 µM H<sub>2</sub>DCFDA staining solution.  
598 Images was acquired with a confocal microscope. For quantification a defined region



599 of interest (ROI) located 500  $\mu\text{m}$  above the root tip (excluding the root cap) was used  
600 in all samples. Staining for lignin (phloroglucinol) and callose (aniline blue) was  
601 performed as described in [33] and [51], respectively. ROS, phloroglucinol and  
602 aniline blue staining was quantified on micrographs using ImageJ software [76].

603

#### 604 **JA measurements**

##### 605 *Chemicals*

606 Jasmonic acid- $\text{d}_0$  and jasmonic acid- $\text{d}_5$  were obtained from Santa Cruz Biotechnology,  
607 Inc. (Dallas, TX, USA). Formic acid was obtained from Merck (Darmstadt,  
608 Germany), ethyl acetate and acetonitrile (LC-MS grade) were obtained from  
609 Honeywell (Seelze, Germany). Water used for chromatographic separations was  
610 purified with an AQUA-Lab – B30 – Integrity system (AQUA-Lab, Ransbach-  
611 Baubach, Germany).

612

##### 613 *Sample preparation*

614 Approximately 35 to 40 seedlings per flask were grown in liquid culture (1/2 MS,  
615 0.3% sucrose) under continuous light and 18°C for seven days followed by treatment  
616 with mock or 600 nM isoxaben for seven hours and harvesting in liquid nitrogen. The  
617 grinded plant material (100-200 mg) was placed in a 2 mL bead beater tube (CKMix-  
618 2 mL, Bertin Technologies, Montigny-le-Bretonneux, France), filled with ceramic  
619 balls (zirconium oxide; mix beads of 1.4 mm and 2.8 mm), and an aliquot (20  $\mu\text{L}$ ) of  
620 a solution of acetonitrile containing the internal standard (-)*trans*-jasmonic acid- $\text{d}_5$  (25  
621  $\mu\text{g}/\text{mL}$ ), was added. After incubation for 30 min at room temperature, the tube was  
622 filled with ice-cold ethyl acetate (1 mL). After extractive grinding (3  $\times$  20 s with 40 s  
623 breaks; 6000 rpm) using the bead beater (Precellys Homogenizer, Bertin

624 Technologies, Montigny-le-Bretonneux, France), the supernatant was membrane  
625 filtered (0.45  $\mu\text{m}$ ), evaporated to dryness (Christ RVC 2-25 CD *plus*, Martin Christ  
626 Gefriertrocknungsanlagen GmbH, Osterode am Harz, Germany), resolved in  
627 acetonitrile (70  $\mu\text{L}$ ) and injected into the LC-MS/MS-system (2  $\mu\text{L}$ ).  
628  
629 *Liquid Chromatography-Triple Quadrupole Mass Spectrometry (LC-MS/MS)*  
630 Phytohormone concentrations were measured by means of UHPLC-MS/MS using a  
631 QTRAP 6500+ mass spectrometer (Sciex, Darmstadt, Germany) in the multiple  
632 reaction monitoring (MRM) mode. Positive ions were detected at an ion spray voltage  
633 at 5500 V (ESI+) and the following ion source parameters: temperature (550°C), gas  
634 1 (55 psi), gas 2 (65 psi), curtain gas (35 psi), entrance potential (10 V) and collision  
635 activated dissociation (3 V). The temperature of the column oven was adjusted to  
636 40°C. For plant hormone analysis, the MS/MS parameters of the compounds were  
637 tuned to achieve fragmentation of the  $[M+H]^+$  molecular ions into specific product  
638 ions: (-)trans-jasmonic acid- $\text{d}_0$  211 $\rightarrow$ 133 (quantifier) and 211 $\rightarrow$ 151 (qualifier),  
639 (-)trans-jasmonic acid- $\text{d}_5$  216 $\rightarrow$ 155 (quantifier) and 216 $\rightarrow$ 173 (qualifier). For the  
640 tuning of the mass spectrometer, solutions of the analyte and the labelled internal  
641 standard (solved in acetonitrile:water, 1:1) were introduced into the MS system by  
642 means of flow injection using a syringe pump. Separation of all samples was carried  
643 out by means of an ExionLC UHPLC (Shimadzu Europa GmbH, Duisburg,  
644 Germany), consisting of two LC pump systems (ExionLC AD), an ExionLC degasser,  
645 an ExionLC AD autosampler, an ExionLC AC column oven – 240 V and an ExionLC  
646 controller. After sample injection (2  $\mu\text{L}$ ), chromatography was carried out on an  
647 analytical Kinetex F5 column (100  $\times$  2.1 mm<sup>2</sup>, 100 Å, 1.7  $\mu\text{m}$ , Phenomenex,  
648 Aschaffenburg, Germany). Chromatography was performed with a flow rate of 0.4

649 mL/min using 0.1% formic acid in water (v/v) as solvent A and 0.1% formic acid in  
650 acetonitrile (v/v) as solvent B, and the following gradient: 0% B held for 2 min,  
651 increased in 1 min to 30% B, in 12 min to 30% B, increased in 0.5 min to 100% B,  
652 held 2 min isocratically at 100% B, decreased in 0.5 min to 0% B, held 3 min at 0%  
653 B. Data acquisition and instrumental control was performed using Analyst 1.6.3  
654 software (Sciex, Darmstadt, Germany).

655

### 656 **Hypocotyl and root measurements**

657 For measuring etiolated hypocotyl length, seedlings were grown for five days on half-  
658 strength MS agar supplemented with 0.3 % sucrose. Seedlings were photographed and  
659 hypocotyl length was measured using ImageJ. For root growth assays, seedlings were  
660 grown for seven days in long-day conditions at 21°C on half-strength MS agar  
661 supplemented with 0.3 % sucrose. Plates were inclined at 10 degrees. Root length was  
662 measures using ImageJ. For root growth recovery assays seedlings were grown on  
663 half-strength MS agar supplemented with 0.3 % sucrose. Seeds were stratified for two  
664 days followed by incubation at 21°C in long day conditions for seven days. Plates  
665 were inclined at 10 degrees. Individual seedlings were transferred to plates containing  
666 either 0.01 percent DMSO (mock) or 600 nM isoxaben for 24 hours. After treatment,  
667 seedlings were transferred onto half-strength MS agar plates supplemented with 0.3 %  
668 sucrose. The position of the root tip was marked under a dissection microscope. Root  
669 length was measured every 24 hours for up to three days. For root cell bulging assays  
670 seedlings were grown for seven days in long-day conditions at 21°C on half-strength  
671 MS agar supplemented with 0.3 % sucrose. Plates were inclined at 10 degrees.  
672 Individual seedlings were first transferred into liquid medium for two hours  
673 habituation followed by treatment with 600 nM isoxaben for up to seven hours. To

674 take images, seedlings were stained with 4  $\mu$ M FM4-64 for 10 minutes and imaged  
675 using confocal microscopy. Confocal micrographs were acquired at each time point.  
676 All hypocotyl length or root measurements were performed in double-blind fashion.

677

#### 678 **Statistics**

679 Statistical analysis was performed with PRISM8 software (GraphPad Software, San  
680 Diego, USA).

681

#### 682 **Microscopy and art work**

683 Images of seedlings exhibiting phloroglucinol staining were taken on a Leica MZ16  
684 stereo microscope equipped with a Leica DFC320 digital camera. Images of  
685 hypocotyl and root length were taken on a Leica SAPO stereo microscope equipped  
686 with a Nikon Coolpix B500 camera. Aniline blue-stained cotyledons and root cell  
687 bulging were imaged with an Olympus FV1000 setup using an inverted IX81 stand  
688 and FluoView software (FV10-ASW version 01.04.00.09) (Olympus Europa GmbH,  
689 Hamburg, Germany) equipped with a 10x objective (NA 0.3). For assessing cell  
690 bulging a projection of a 5  $\mu$ m z-stack encompassing seven individual optical sections  
691 was used. Aniline blue fluorescence was excited at 405 nm using a diode laser and  
692 detected at 425 to 525 nm. H<sub>2</sub>DCFDA and EGFP fluorescence excitation was done at  
693 488 nm using a multi-line argon laser and detected at 502 to 536 nm. For the direct  
694 comparisons of fluorescence intensities, laser, pinhole and gain settings of the  
695 confocal microscope were kept identical when capturing the images from the  
696 seedlings of different treatments. Scan speeds were set at 400 Hz and line averages at  
697 between 2 and 4. Measurements on digital micrographs were done using ImageJ  
698 software [76]. Images were adjusted for color and contrast using Adobe Photoshop

699 CC software (Adobe, San Jose, USA).

700

## 701 **Acknowledgments**

702 We acknowledge Ramon Torres Ruiz and other members of the Schneitz lab for  
703 helpful discussion and suggestions. We thank Herman Höfte for *the1* alleles. We also  
704 thank Lynette Fulton, Silke Robatzek, Martin Stegmann and Sebastian Wolf for  
705 critical reading of the manuscript. We further acknowledge the support of the Center  
706 for Advanced Light Microscopy (CALM) at the TUM School of Life Sciences. This  
707 work was funded by the German Research Council (DFG) through grants SFB924  
708 (TP B12) to CD and SFB924 (TP A2) to KS.

709

## 710 **AUTHOR CONTRIBUTIONS**

711 A.C., C.D. and K.S. designed the research. A.C., X.C., J.G., B.L. and R.H. performed  
712 research. A.C., X.C., J.G., B.L., C.D. and K.S. analyzed the data. K.S. wrote the  
713 paper.

714

## 715 **References**

- 716 1. Lampugnani ER, Khan GA, Somssich M, Persson S (2018) Building a plant cell  
717 wall at a glance. *J Cell Sci* 131:
- 718 2. Höfte H, Voxeur A (2017) Plant cell walls. *Current Biology* 27: R865-R870.
- 719 3. Cosgrove DJ (2016) Plant cell wall extensibility: connecting plant cell growth  
720 with cell wall structure, mechanics, and the action of wall-modifying enzymes. *J*  
721 *Exp Bot* 67: 463-476.
- 722 4. Boller T, Felix G (2009) A renaissance of elicitors: perception of microbe-  
723 associated molecular patterns and danger signals by pattern-recognition  
724 receptors. *Annu Rev Plant Biol* 60: 379-406.

- 725 5. Franck CM, Westermann J, Boisson-Dernier A (2018) Plant malectin-like  
726 receptor kinases: from cell wall integrity to immunity and beyond. *Annu Rev*  
727 *Plant Biol* 69: 301-328.
- 728 6. Voxeur A, Höfte H (2016) Cell wall integrity signaling in plants: “To grow or  
729 not to grow that’s the question”. *Glycobiology* 26: 950-960.
- 730 7. Wolf S (2017) Plant cell wall signalling and receptor-like kinases. *Biochem J*  
731 474: 471-492.
- 732 8. Wolf S, van der Does D, Ladwig F, Sticht C, Kolbeck A, Schurholz AK et al.  
733 (2014) A receptor-like protein mediates the response to pectin modification by  
734 activating brassinosteroid signaling. *Proc Natl Acad Sci U S A* 111: 15261-  
735 15266.
- 736 9. Wolf S, Mravec J, Greiner S, Mouille G, Höfte H (2012) Plant cell wall  
737 homeostasis is mediated by brassinosteroid feedback signaling. *Curr Biol* 22:  
738 1732-1737.
- 739 10. Escobar-Restrepo JM, Huck N, Kessler S, Gagliardini V, Gheyselinck J, Yang  
740 WC et al. (2007) The FERONIA receptor-like kinase mediates male-female  
741 interactions during pollen tube reception. *Science* 317: 656-660.
- 742 11. Feng W, Kita D, Peaucelle A, Cartwright HN, Doan V, Duan Q et al. (2018)  
743 The FERONIA receptor kinase maintains cell-wall integrity during salt stress  
744 through Ca<sup>2+</sup> signaling. *Curr Biol* 28: 666-675.e5.
- 745 12. Boisson-Dernier A, Roy S, Kritas K, Grobei MA, Jaciubek M, Schroeder JI et  
746 al. (2009) Disruption of the pollen-expressed FERONIA homologs ANXUR1  
747 and ANXUR2 triggers pollen tube discharge. *Development* 136: 3279-3288.
- 748 13. Franck C, Westermann J, Bürssner S, Lentz R, Lituiev DS, Boisson-Dernier A  
749 (2018) The protein phosphatases ATUNIS1 and ATUNIS2 regulate cell wall  
750 integrity in tip-growing cells. *Plant Cell*
- 751 14. Mecchia MA, Santos-Fernandez G, Duss NN, Somoza SC, Boisson-Dernier A,  
752 Gagliardini V et al. (2017) RALF4/19 peptides interact with LRX proteins to  
753 control pollen tube growth in Arabidopsis. *Science*
- 754 15. Miyazaki S, Murata T, Sakurai-Ozato N, Kubo M, Demura T, Fukuda H et al.  
755 (2009) ANXUR1 and 2, sister genes to FERONIA/SIRENE, are male factors for  
756 coordinated fertilization. *Curr Biol* 19: 1327-1331.

- 757 16. Somerville C, Bauer S, Brininstool G, Facette M, Hamann T, Milne J et al.  
758 (2004) Toward a systems approach to understanding plant cell walls. *Science*  
759 306: 2206-2211.
- 760 17. Caño-Delgado A, Penfield S, Smith C, Catley M, Bevan M (2003) Reduced  
761 cellulose synthesis invokes lignification and defense responses in *Arabidopsis*  
762 *thaliana*. *Plant J* 34: 351-362.
- 763 18. Cano-Delgado AI, Metzlaflf K, Bevan MW (2000) The *eli1* mutation reveals a  
764 link between cell expansion and secondary cell wall formation in *Arabidopsis*  
765 *thaliana*. *Development* 127: 3395-3405.
- 766 19. Ellis C, Karafyllidis I, Wasternack C, Turner JG (2002) The *Arabidopsis* mutant  
767 *cev1* links cell wall signaling to jasmonate and ethylene responses. *Plant Cell*  
768 14: 1557-1566.
- 769 20. Ellis C, Turner JG (2001) The *Arabidopsis* mutant *cev1* has constitutively active  
770 jasmonate and ethylene signal pathways and enhanced resistance to pathogens.  
771 *Plant Cell* 13: 1025-1033.
- 772 21. Fagard M, Desnos T, Desprez T, Goubet F, Refregier G, Mouille G et al. (2000)  
773 PROCUSTE1 encodes a cellulose synthase required for normal cell elongation  
774 specifically in roots and dark-grown hypocotyls of *Arabidopsis*. *Plant Cell* 12:  
775 2409-2424.
- 776 22. Heim DR, Skomp JR, Tschabold EE, Larrinua IM (1990) Isoxaben Inhibits the  
777 Synthesis of Acid Insoluble Cell Wall Materials In *Arabidopsis thaliana*. *Plant*  
778 *Physiol* 93: 695-700.
- 779 23. Lefebvre A, Maizonnier D, Gaudry JC, Clair D, Scalla R (1987) Some effects of  
780 the herbicide EL-107 on cellular growth and metabolism. *Weed Research* 27:  
781 125-134.
- 782 24. Desprez T, Vernhettes S, Fagard M, Refrégier G, Desnos T, Aletti E et al.  
783 (2002) Resistance against herbicide isoxaben and cellulose deficiency caused by  
784 distinct mutations in same cellulose synthase isoform CESA6. *Plant Physiol*  
785 128: 482-490.
- 786 25. Scheible WR, Eshed R, Richmond T, Delmer D, Somerville C (2001)  
787 Modifications of cellulose synthase confer resistance to isoxaben and  
788 thiazolidinone herbicides in *Arabidopsis Ixr1* mutants. *Proc Natl Acad Sci U S*  
789 *A* 98: 10079-10084.

- 790 26. Paredez AR, Somerville CR, Ehrhardt DW (2006) Visualization of cellulose  
791 synthase demonstrates functional association with microtubules. *Science* 312:  
792 1491-1495.
- 793 27. Heim DR, Skomp JR, Waldron C, Larrinua IM (1991) Differential response to  
794 isoxaben of cellulose biosynthesis by wild-type and resistant strains of  
795 *Arabidopsis thaliana*. *Pesticide Biochemistry and Physiology* 39: 93-99.
- 796 28. Engelsdorf T, Gigli-Bisceglia N, Veerabagu M, McKenna JF, Vaahtera L,  
797 Augstein F et al. (2018) The plant cell wall integrity maintenance and immune  
798 signaling systems cooperate to control stress responses in *Arabidopsis thaliana*.  
799 *Sci Signal* 11:
- 800 29. Hamann T (2015) The plant cell wall integrity maintenance mechanism--a case  
801 study of a cell wall plasma membrane signaling network. *Phytochemistry* 112:  
802 100-109.
- 803 30. Wormit A, Butt SM, Chairam I, McKenna JF, Nunes-Nesi A, Kjaer L et al.  
804 (2012) Osmosensitive changes of carbohydrate metabolism in response to  
805 cellulose biosynthesis inhibition. *Plant Physiol* 159: 105-117.
- 806 31. Hamann T, Bennett M, Mansfield J, Somerville C (2009) Identification of cell-  
807 wall stress as a hexose-dependent and osmosensitive regulator of plant  
808 responses. *Plant J* 57: 1015-1026.
- 809 32. Hématy K, Sado PE, Van Tuinen A, Rochange S, Desnos T, Balzergue S et al.  
810 (2007) A receptor-like kinase mediates the response of *Arabidopsis* cells to the  
811 inhibition of cellulose synthesis. *Curr Biol* 17: 922-931.
- 812 33. Van der Does D, Boutrot F, Engelsdorf T, Rhodes J, McKenna JF, Vernhettes S  
813 et al. (2017) The *Arabidopsis* leucine-rich repeat receptor kinase MIK2/LRR-  
814 KISS connects cell wall integrity sensing, root growth and response to abiotic  
815 and biotic stresses. *PLoS Genet* 13: e1006832.
- 816 34. Julkowska M, Koevoets IT, Mol S, Hoefsloot HC, Feron R, Tester M et al.  
817 (2017) Genetic components of root architecture remodeling in response to salt  
818 stress. *Plant Cell*
- 819 35. Wang T, Liang L, Xue Y, Jia PF, Chen W, Zhang MX et al. (2016) A receptor  
820 heteromer mediates the male perception of female attractants in plants. *Nature*  
821 531: 241-244.



- 822 36. Xu SL, Rahman A, Baskin TI, Kieber JJ (2008) Two leucine-rich repeat  
823 receptor kinases mediate signaling, linking cell wall biosynthesis and ACC  
824 synthase in *Arabidopsis*. *Plant Cell* 20: 3065-3079.
- 825 37. Gonneau M, Desprez T, Martin M, Doblus VG, Bacete L, Miart F et al. (2018)  
826 Receptor kinase THESEUS1 Is a Rapid Alkalinization Factor 34 Receptor in  
827 *Arabidopsis*. *Curr Biol* 28: 2452-2458.e4.
- 828 38. Chevalier D, Batoux M, Fulton L, Pfister K, Yadav RK, Schellenberg M et al.  
829 (2005) *STRUBBELIG* defines a receptor kinase-mediated signaling pathway  
830 regulating organ development in *Arabidopsis*. *Proc Natl Acad Sci U S A* 102:  
831 9074-9079.
- 832 39. Kwak SH, Shen R, Schiefelbein J (2005) Positional signaling mediated by a  
833 receptor-like kinase in *Arabidopsis*. *Science* 307: 1111-1113.
- 834 40. Lin L, Zhong SH, Cui XF, Li J, He ZH (2012) Characterization of temperature-  
835 sensitive mutants reveals a role for receptor-like kinase  
836 *SCRAMBLED/STRUBBELIG* in coordinating cell proliferation and  
837 differentiation during *Arabidopsis* leaf development. *Plant J* 72: 707-720.
- 838 41. Vaddepalli P, Fulton L, Batoux M, Yadav RK, Schneitz K (2011) Structure-  
839 function analysis of *STRUBBELIG*, an *Arabidopsis* atypical receptor-like  
840 kinase involved in tissue morphogenesis. *PLoS One* 6: e19730.
- 841 42. Sager RE, Lee JY (2018) Plasmodesmata at a glance. *J Cell Sci* 131: jcs209346.
- 842 43. Otero S, Helariutta Y, Benitez-Alfonso Y (2016) Symplastic communication in  
843 organ formation and tissue patterning. *Curr Opin Plant Biol* 29: 21-28.
- 844 44. Vaddepalli P, Herrmann A, Fulton L, Oelschner M, Hillmer S, Stratil TF et al.  
845 (2014) The C2-domain protein *QUIRKY* and the receptor-like kinase  
846 *STRUBBELIG* localize to plasmodesmata and mediate tissue morphogenesis in  
847 *Arabidopsis thaliana*. *Development* 141: 4139-4148.
- 848 45. Fulton L, Batoux M, Vaddepalli P, Yadav RK, Busch W, Andersen SU et al.  
849 (2009) *DETORQUEO*, *QUIRKY*, and *ZERZAUST* represent novel components  
850 involved in organ development mediated by the receptor-like kinase  
851 *STRUBBELIG* in *Arabidopsis thaliana*. *PLoS Genet* 5: e1000355.
- 852 46. Vaddepalli P, Fulton L, Wieland J, Wassmer K, Schaeffer M, Ranf S et al.  
853 (2017) The cell wall-localized atypical  $\beta$ -1,3 glucanase *ZERZAUST* controls  
854 tissue morphogenesis in *Arabidopsis thaliana*. *Development* 144: 2259-2269.

- 855 47. Desprez T, Juraniec M, Crowell EF, Jouy H, Pochylova Z, Parcy F et al. (2007)  
856 Organization of cellulose synthase complexes involved in primary cell wall  
857 synthesis in *Arabidopsis thaliana*. *Proc Natl Acad Sci U S A*
- 858 48. Persson S, Paredez A, Carroll A, Palsdottir H, Doblin M, Poindexter P et al.  
859 (2007) Genetic evidence for three unique components in primary cell-wall  
860 cellulose synthase complexes in *Arabidopsis*. *Proc Natl Acad Sci U S A*
- 861 49. Henry E, Fung N, Liu J, Drakakaki G, Coaker G (2015) Beyond glycolysis:  
862 GAPDHs are multi-functional enzymes involved in regulation of ros, autophagy,  
863 and plant immune responses. *PLoS Genet* 11: e1005199.
- 864 50. Juárez SP, Mangano S, Estevez JM (2015) Improved ROS measurement in root  
865 hair cells. *Methods Mol Biol* 1242: 67-71.
- 866 51. Schenk ST, Schikora A (2015) Staining of callose depositions in root and leaf  
867 tissues. *Bio-protocol* 5: e1429.
- 868 52. Heim DR, Roberts JL, Pike PD, Larrinua IM (1990) A second locus, *Ixr B1* in  
869 *Arabidopsis thaliana*, that confers resistance to the herbicide isoxaben. *Plant*  
870 *Physiol* 92: 858-861.
- 871 53. Trehin C, Schrempp S, Chauvet A, Berne-Dedieu A, Thierry AM, Faure JE et  
872 al. (2013) QUIRKY interacts with STRUBBELIG and PAL OF QUIRKY to  
873 regulate cell growth anisotropy during *Arabidopsis* gynoecium development.  
874 *Development* 140: 4807-4817.
- 875 54. Song JH, Kwak SH, Nam KH, Schiefelbein J, Lee MM (2019) QUIRKY  
876 regulates root epidermal cell patterning through stabilizing SCRAMBLED to  
877 control CAPRICE movement in *Arabidopsis*. *Nat Commun* 10: 1744.
- 878 55. Sampathkumar A, Yan A, Krupinski P, Meyerowitz EM (2014) Physical forces  
879 regulate plant development and morphogenesis. *Curr Biol* 24: R475-83.
- 880 56. Kwak SH, Woo S, Lee MM, Schiefelbein J (2014) Distinct signaling  
881 mechanisms in multiple developmental pathways by the SCRAMBLED receptor  
882 of *Arabidopsis*. *Plant Physiol* 166: 976-987.
- 883 57. Denness L, McKenna JF, Segonzac C, Wormit A, Madhou P, Bennett M et al.  
884 (2011) Cell wall damage-induced lignin biosynthesis is regulated by a reactive  
885 oxygen species- and jasmonic acid-dependent process in *Arabidopsis*. *Plant*  
886 *Physiol* 156: 1364-1374.

- 887 58. Kohorn BD, Kobayashi M, Johansen S, Riese J, Huang LF, Koch K et al. (2006)  
888 An Arabidopsis cell wall-associated kinase required for invertase activity and  
889 cell growth. *Plant J* 46: 307-316.
- 890 59. Engelsdorf T, Hamann T (2014) An update on receptor-like kinase involvement  
891 in the maintenance of plant cell wall integrity. *Ann Bot* 114: 1339-1347.
- 892 60. Haswell ES, Verslues PE (2015) The ongoing search for the molecular basis of  
893 plant osmosensing. *J Gen Physiol* 145: 389-394.
- 894 61. Nissen KS, Willats WGT, Malinovsky FG (2016) Understanding CrRLK1L  
895 Function: Cell Walls and Growth Control. *Trends Plant Sci* 21: 516-527.
- 896 62. He Y, Zhou J, Shan L, Meng X (2018) Plant cell surface receptor-mediated  
897 signaling - a common theme amid diversity. *J Cell Sci* 131: 1-11.
- 898 63. Ma X, Xu G, He P, Shan L (2016) SERKING Coreceptors for Receptors. *Trends*  
899 *Plant Sci* 21: 1017-1033.
- 900 64. Schwessinger B, Roux M, Kadota Y, Ntoukakis V, Sklenar J, Jones A et al.  
901 (2011) Phosphorylation-dependent differential regulation of plant growth, cell  
902 death, and innate immunity by the regulatory receptor-like kinase BAK1. *PLoS*  
903 *Genet* 7: e1002046.
- 904 65. Perraki A, DeFalco TA, Derbyshire P, Avila J, Séré D, Sklenar J et al. (2018)  
905 Phosphocode-dependent functional dichotomy of a common co-receptor in plant  
906 signalling. *Nature*
- 907 66. Cao Y, Liang Y, Tanaka K, Nguyen CT, Jedrzejczak RP, Joachimiak A et al.  
908 (2014) The kinase LYK5 is a major chitin receptor in *Arabidopsis* and forms a  
909 chitin-induced complex with related kinase CERK1. *Elife* 3:
- 910 67. Stegmann M, Monaghan J, Smakowska-Luzan E, Rovenich H, Lehner A,  
911 Holton N et al. (2017) The receptor kinase FER is a RALF-regulated scaffold  
912 controlling plant immune signaling. *Science* 355: 287-289.
- 913 68. Wang ZP, Xing HL, Dong L, Zhang HY, Han CY, Wang XC et al. (2015) Egg  
914 cell-specific promoter-controlled CRISPR/Cas9 efficiently generates  
915 homozygous mutants for multiple target genes in *Arabidopsis* in a single  
916 generation. *Genome Biol* 16: 144.
- 917 69. Xie K, Zhang J, Yang Y (2014) Genome-wide prediction of highly specific  
918 guide RNA spacers for CRISPR-Cas9-mediated genome editing in model plants  
919 and major crops. *Mol Plant* 7: 923-926.

- 920 70. Koncz C, Schell J (1986) The promoter of TL-DNA gene 5 controls the tissue-  
921 specific expression of chimaeric genes carried by a novel type of *Agrobacterium*  
922 binary vector. *Mol Gen Genet* 204: 383-396.
- 923 71. Clough SJ, Bent AF (1998) Floral dip: a simplified method for *Agrobacterium*-  
924 mediated transformation of *Arabidopsis thaliana*. *Plant J* 16: 735-743.
- 925 72. Kumar M, Turner S (2015) Protocol: a medium-throughput method for  
926 determination of cellulose content from single stem pieces of *Arabidopsis*  
927 *thaliana*. *Plant Methods* 11: 46.
- 928 73. Updegraff DM (1969) Semimicro determination of cellulose in biological  
929 materials. *Anal Biochem* 32: 420-424.
- 930 74. Box MS, Coustham V, Dean C, Mylne JS (2011) Protocol: A simple phenol-  
931 based method for 96-well extraction of high quality RNA from *Arabidopsis*.  
932 *Plant Methods* 7: 7.
- 933 75. Enugutti B, Kirchhelle C, Oelschner M, Torres Ruiz RA, Schliebner I, Leister D  
934 et al. (2012) Regulation of planar growth by the *Arabidopsis* AGC protein  
935 kinase UNICORN. *Proc Natl Acad Sci U S A* 109: 15060-15065.
- 936 76. Rueden CT, Schindelin J, Hiner MC, DeZonia BE, Walter AE, Arena ET et al.  
937 (2017) ImageJ2: ImageJ for the next generation of scientific image data. *BMC*  
938 *Bioinformatics* 18: 529.
- 939
- 940
- 941
- 942
- 943
- 944
- 945
- 946
- 947
- 948
- 949

950 **Figures**

951

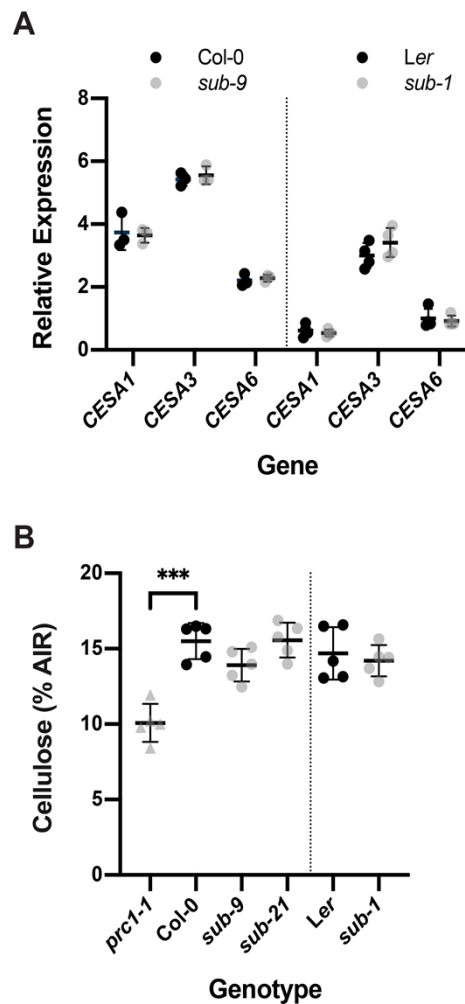

952

953 **Fig 1. Effects of *SUB* on cellulose content in seven-day-old seedlings.** (A) Gene  
954 expression levels for primary cell wall *CESA* genes in wild type and *sub* as assessed  
955 by qPCR. Individual *CESA* genes and genotypes are indicated. Mean  $\pm$  SD is shown.  
956 Data points designate results of individual biological replicates. The experiment was  
957 performed two times with similar results. (B) Estimation of cellulose content.  
958 Genotypes are indicated. Data points indicate results of individual biological  
959 replicates. Mean  $\pm$  SD is shown. Asterisks represent statistical significance ( $P <$   
960 0.0001, unpaired t test, two-tailed P values). No significant difference was observed  
961 between wild type and different *sub* mutants. Plants with a defect in *CESA6* (*prc1-1*)

962 show a reduction in cellulose content as previously reported [21]. The experiment was

963 repeated three times with similar results.

964

965

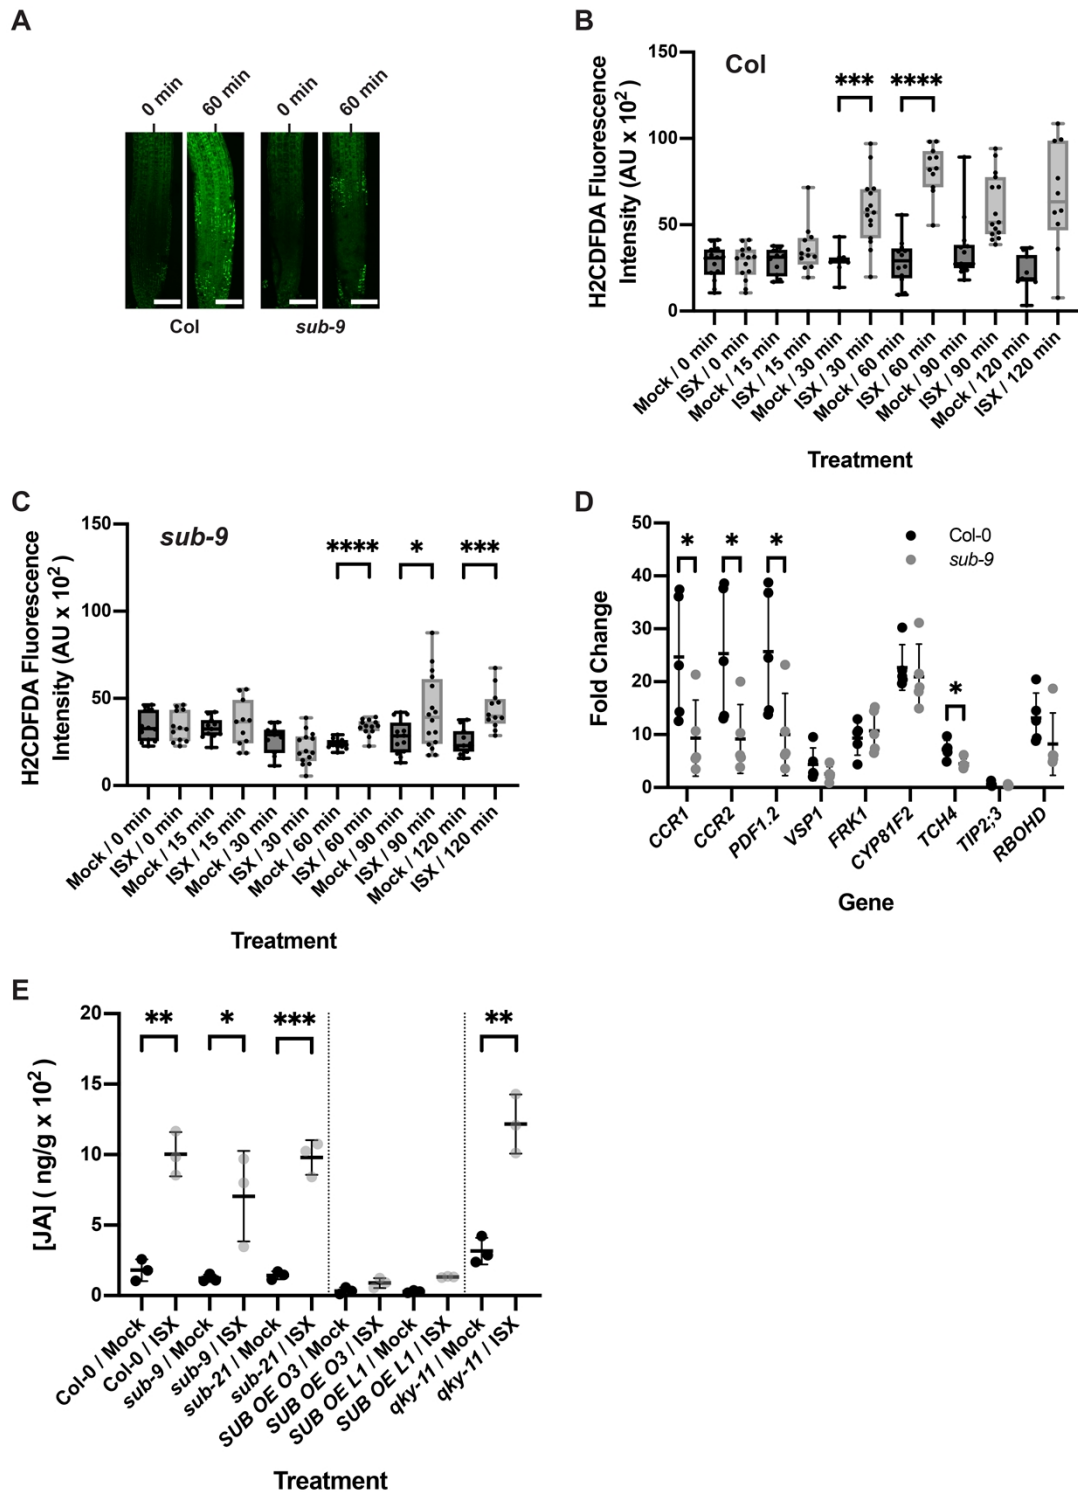

966

967 **Fig. 2. *SUB* effects on isoxaben-induced ROS production, marker gene**  
968 **expression and JA accumulation.** (A) Confocal micrographs showing H<sub>2</sub>CFDA  
969 signal in root tips of six-day-old seedlings exposed to 600 nM isoxaben for the  
970 specified time. Genotypes are indicated. Note reduced signal in *sub-9*. (B, C)  
971 Quantification of results depicted in (A). Genotypes are indicated. Box and whisker  
972 plots are shown.  $10 \leq n \leq 14$ . Asterisks represent statistical significance (\*\*\*\*,  $P <$   
973  $0.0001$ ; \*\*\*  $P < 0.002$ , \*  $P < 0.05$ , unpaired t test, two-tailed P values). Experiments  
974 were performed three times with similar results. (D) Gene expression levels of several  
975 CBI marker genes by qPCR upon exposure of seven-day-old seedlings to 600 nM  
976 isoxaben for eight hours. The results from five biological replicates are shown.  
977 Marker genes and genotypes are indicated. Mean  $\pm$  SD is presented. Asterisks  
978 represent statistical significance (\*,  $P < 0.05$ , unpaired t test, two-tailed P values). The  
979 experiment was repeated twice with similar results. (E) JA accumulation. Genotypes  
980 and treatments are indicated. Asterisks represent statistical significance (\*\*\*,  $P <$   
981  $0.002$ ; \*\*,  $P < 0.003$ ; \*  $P < 0.05$ , unpaired t test, two-tailed P values).  $n = 3$ .  
982 Experiments were repeated three times with similar results. Scale bars: (A) 100  $\mu\text{m}$ .  
983  
984



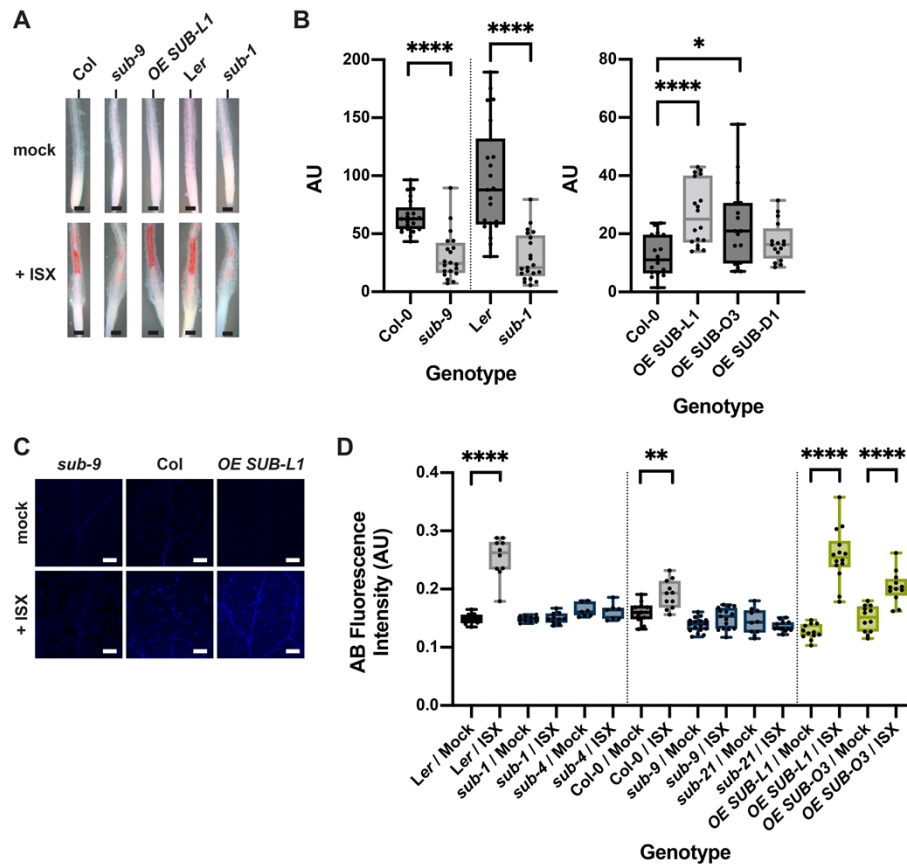

985

986 **Fig. 3. *SUB* affects isoxaben-induced lignin and callose accumulation. (A)**

987 Phloroglucinol signal strength indicating lignin accumulation in roots of six-day-old

988 seedlings exposed to 600 nM isoxaben for 12 hours. Genotypes: Col, *sub-9* (Col),

989 *pUBQ::gSUB:mCherry* (line L1), *Ler*, and *sub-1* (*Ler*). (B) Quantification of the

990 results depicted in (A). Left panel shows results obtained from different *sub* mutants

991 in the Col or *Ler* background. Right panel depicts results from three independent

992 *pUBQ::gSUB:mCherry* transgenic lines overexpressing *SUB* (Col, lines L1, O3, D1).

993 Box and whisker plots are shown.  $16 \leq n \leq 21$ . Asterisks represent statistical

994 significance (\*  $P < 0.02$ , \*\*\*\*,  $P < 0.0001$ ; unpaired t test, two-tailed P values). The

995 experiment was performed three times with similar results. (C) Confocal micrographs

996 show cotyledons of seven-day-old *sub-9*, Col, and *pUBQ::gSUB:mCherry* (line L1)

997 seedlings treated with mock or 600 nM isoxaben for 24 hours. Aniline blue

998 fluorescence signal strength indicates callose accumulation. (D) Quantification of the



999 results depicted in (C). Left panel shows results obtained from *sub* mutants in *Ler*  
 1000 background. Center panels indicates results obtained from *sub* mutants in Col  
 1001 background. Right panel depicts results from two independent *pUBQ::gSUB:mCherry*  
 1002 transgenic lines overexpressing *SUB* (Col, lines L1, O3). Box and whisker plots are  
 1003 shown.  $7 \leq n \leq 18$ . Asterisks represent statistical significance (\*\*\*\*,  $P < 0.0001$ ; \*\*  $P <$   
 1004  $0.004$ , unpaired t test, two-tailed P values). The experiment was performed three times  
 1005 with similar results. Scale bars: (A) 0.1 mm; (C) 0.2 mm.

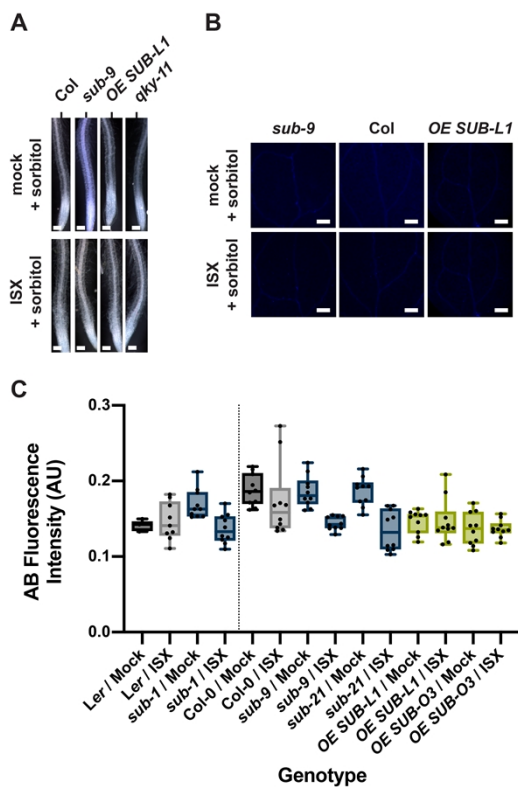

1008  
 1009 **Fig. 4. The effects of sorbitol on lignin and callose accumulation upon isoxaben**  
 1010 **exposure.** (A) Phloroglucinol signal strength indicating lignin accumulation in roots  
 1011 of six-day-old seedlings exposed to mock/300 mM sorbitol or to 600 nM  
 1012 isoxaben/300 mM sorbitol for 12 hours. Genotypes: Col, *sub-9* (Col),  
 1013 *pUBQ::gSUB:mCherry* (line L1), *qky-11* (Col). Note absence of detectable signal.

1014 The experiment was performed three times with similar results ( $n \geq 10$ ). (B) Confocal  
1015 micrographs show cotyledons of seven-day-old *sub-9*, Col, and  
1016 *pUBQ::gSUB:mCherry* (Col, line L1) seedlings treated with mock/300 mM sorbitol  
1017 or 600 nM isoxaben/300 mM sorbitol for 24 hours. Aniline blue fluorescence signal  
1018 strength indicates callose accumulation. No increase in signal intensity can be  
1019 observed in isoxaben-treated seedlings. (C) Quantification of the results depicted in  
1020 (B). Left panel depicts results obtained from *sub-1* mutants in *Ler* background. Right  
1021 panel shows results obtained from *sub* mutants in Col background and also depicts  
1022 results from two independent *pUBQ::gSUB:mCherry* transgenic lines overexpressing  
1023 *SUB* (Col, lines L1, O3). Box and whisker plots are shown.  $5 \leq n \leq 10$ . No statistically  
1024 significant differences were observed (unpaired t tests, two-tailed P values). The  
1025 experiment was performed three times with similar results. Scale bars: (A) 0.1 mm;  
1026 (C) 0.2 mm.

1027

1028

1029

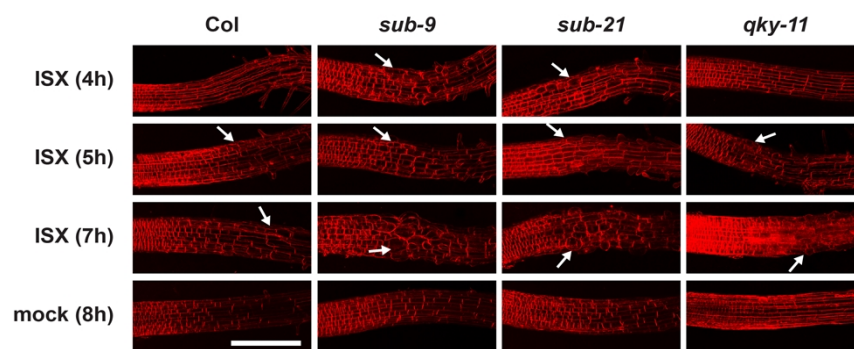

1030 **Fig. 5. Root epidermal cell shape changes upon isoxaben treatment.** Six-day-old  
1031 seedlings counter-stained with the membrane stain FM4-64 are shown. Confocal  
1032 micrographs depict the region where the elongation zone flanks the root meristem.  
1033 Time of exposure in hours to 600 nM isoxaben (ISX) or mock is indicated as are the  
1034 genotypes. Arrows denote aberrant cell shapes. Scale bar: 0.1 mm.

1035

1036

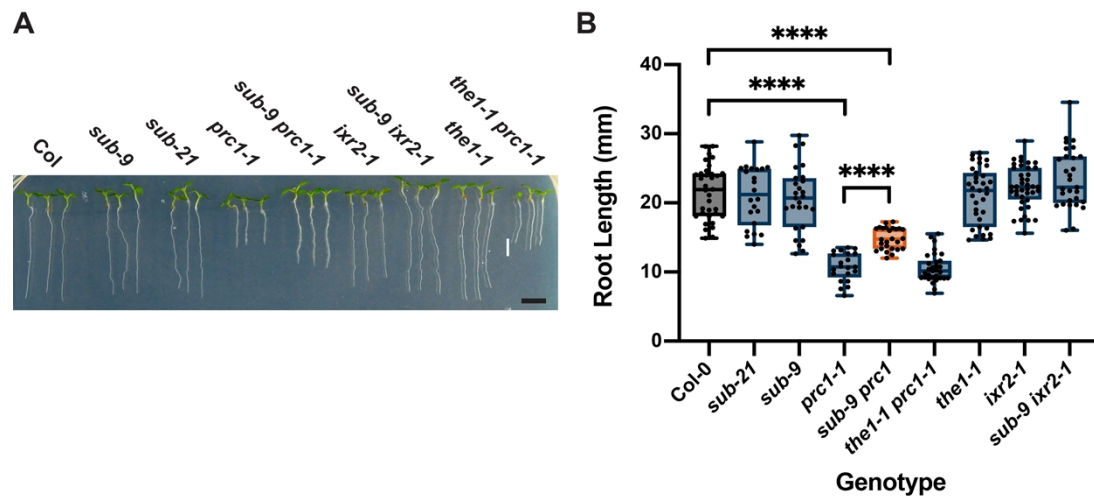

1037

1038 **Fig. 6. SUB effect on root growth inhibition in *prc1-1*.** (A) Root length in seven-

1039 day-old seedlings grown on plates under long-day conditions (16 hours light).

1040 Genotypes are indicated. Note the partial rescue of root length in *sub-9 prc1-1* but not

1041 in *the1-1 prc1-1*. (B) Quantification of the data shown in (A). Box and whisker plots

1042 are shown.  $21 \leq n \leq 40$ . Asterisks represent statistical significance (\*\*\*\*,  $P < 0.0001$ ;

1043 unpaired t test, two-tailed P values). The experiment was performed three times with

1044 similar results. Scale bars: 0.5 mm.

1045

1046

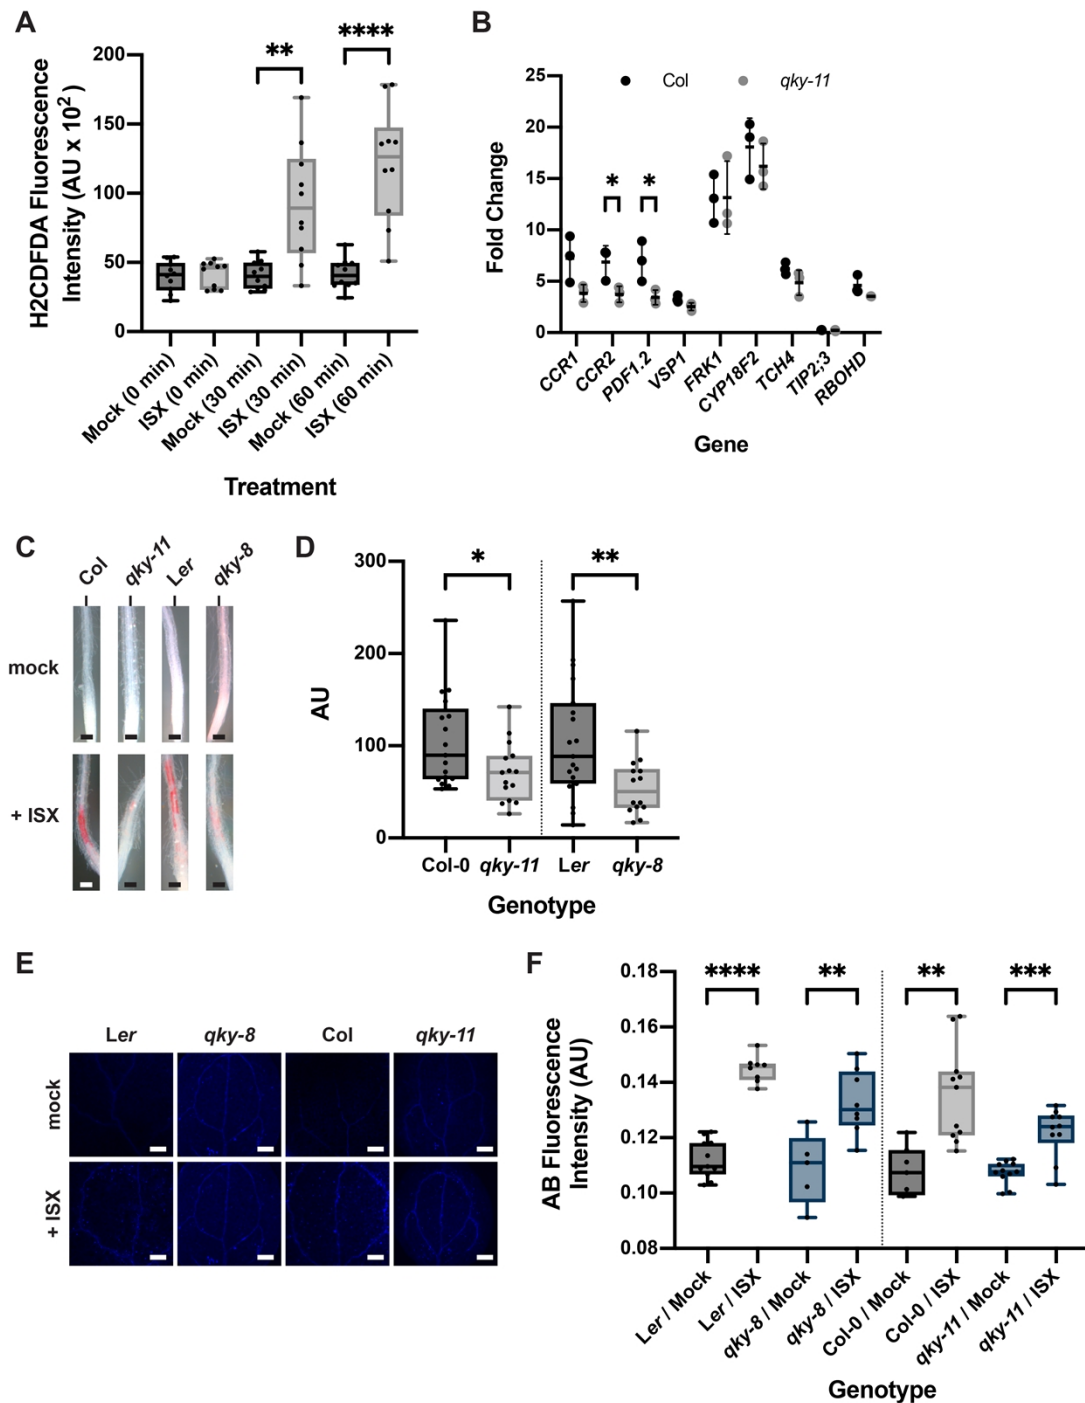

1047

1048 **Fig. 7. Role of *QKY* in isoxaben-induced CBI responses.** (A) Quantification of  
 1049 H<sub>2</sub>CDFDA signal indicating ROS accumulation in root tips of six-day-old *qky-11*  
 1050 seedlings exposed to mock or 600 nM isoxaben for the indicated time. Note the  
 1051 unaltered signal. Box and whisker plots are shown. n = 10. Asterisks represent  
 1052 statistical significance (\*\*, P = 0.0013; \*\*\*\*, P < 0.0001, unpaired t test, two-tailed P  
 1053 values). Experiments were performed three times with similar results. (B) Gene

1054 expression levels of several CBI marker genes by qPCR upon exposure of seven-day-  
1055 old seedlings to 600 nM isoxaben for eight hours. The results from three biological  
1056 replicates are shown. Marker genes and genotypes are indicated. Mean  $\pm$  SD is  
1057 presented. Asterisks represent statistical significance (\*,  $P < 0.05$ , unpaired t test, two-  
1058 tailed P values). The experiment was repeated three times with similar results. (C)  
1059 Phloroglucinol signal strength indicating lignin accumulation in roots of six-day-old  
1060 seedlings exposed to 600 nM isoxaben for 12 hours. Genotypes: Col, *qky-11* (Col),  
1061 *Ler*, and *sub-1* (*Ler*). (D) Quantification of the results depicted in (C). Genotypes are  
1062 indicated. Box and whisker plots are shown.  $15 \leq n \leq 19$ . Asterisks represent  
1063 statistical significance (\*  $P < 0.04$ , \*\*,  $P < 0.01$ ; unpaired t test, two-tailed P values).  
1064 The experiment was performed three times with similar results. (E) Confocal  
1065 micrographs show cotyledons of seven-day-old *Ler*, *qky-8* (*Ler*), Col, and *qky-11*  
1066 (Col) seedlings treated with mock or 600 nM isoxaben for 24 hours. Aniline blue  
1067 fluorescence signal strength indicates callose accumulation. (F) Quantification of the  
1068 results depicted in (E). Left panel shows results obtained from *qky-8* mutants in *Ler*  
1069 background. Right panel indicates results obtained from *qky-11* mutants in Col  
1070 background. Box and whisker plots are shown.  $5 \leq n \leq 11$ . Asterisks represent  
1071 statistical significance (\*\*  $P < 0.006$ , \*\*\*,  $P = 0.0001$ ; \*\*\*\*,  $P < 0.0001$ ; unpaired t test,  
1072 two-tailed P values). The experiment was performed three times with similar results.  
1073 Scale bars: (C) 0.1 mm; (E) 0.2 mm.  
1074  
1075

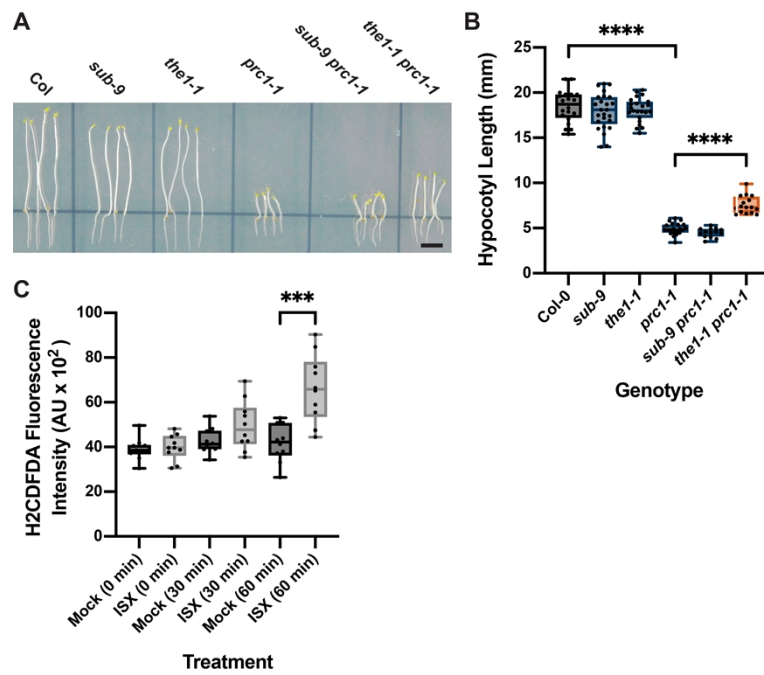

1076

1077 **Fig. 8. Influence of *THE1* on etiolated hypocotyl length of *prc1-1* and isoxaben-**  
1078 **induced ROS accumulation in root tips.** (A) Hypocotyl elongation in six-day-old  
1079 seedlings grown on plates in the dark. Genotypes are indicated. Note the partial rescue  
1080 of hypocotyl elongation in *the1-1 prc1-1* but not in *sub-9 prc1-1*. (B) Quantification  
1081 of the data shown in (A). Box and whisker plots are shown.  $14 \leq n \leq 25$ . Asterisks  
1082 represent statistical significance (\*\*\*\*,  $P < 0.0001$ ; unpaired t test, two-tailed P values).  
1083 The experiment was performed three times with similar results. (C) Quantification of  
1084 H<sub>2</sub>CDFDA signal indicating ROS accumulation in root tips of six-day-old *the1-1*  
1085 seedlings exposed to mock or 600 nM isoxaben for the indicated time. Note the  
1086 unaltered signal at 30 minutes exposure. Box and whisker plots are shown.  $n = 10$ .  
1087 Asterisks represent statistical significance (\*\*\*,  $P = 0.0003$ , unpaired t test, two-tailed  
1088 P values). Experiments were performed three times with similar results. Scale bars:  
1089 0.5 mm.

1090

1091

1092 **Tables**

1093 **Table 1.** Root growth recovery after isoxaben treatment.

| Genotype            | N total <sup>a</sup> | 24 h <sup>b</sup>  | 48 h <sup>b</sup>  | 72 h <sup>b</sup>  |
|---------------------|----------------------|--------------------|--------------------|--------------------|
| <i>Ler</i>          | 110                  | 45.5               | 69.1               | 85.5               |
| <i>sub-1</i>        | 82                   | 24.4**             | 50.0*              | 64.6**             |
| <i>sub-4</i>        | 76                   | 17.1**             | 39.5****           | 52.6****           |
| <i>qky-8</i>        | 87                   | 37.9 <sup>ns</sup> | 64.4 <sup>ns</sup> | 88.5 <sup>ns</sup> |
| Col-0               | 142                  | 38.7               | 65.5               | 90.1               |
| <i>sub-9</i>        | 88                   | 23.9*              | 45.5**             | 70.5**             |
| <i>sub-21</i>       | 72                   | 26.4 <sup>ns</sup> | 51.4 <sup>ns</sup> | 68.1**             |
| <i>qky-11</i>       | 81                   | 37.0 <sup>ns</sup> | 64.2 <sup>ns</sup> | 92.6 <sup>ns</sup> |
| <i>ixr2-1</i>       | 83                   | 97.6****           | 97.6****           | 97.6 <sup>ns</sup> |
| <i>sub-9 ixr2-1</i> | 77                   | 100.0****          | 100.0****          | 100.0**            |
| <i>the1-1</i>       | 78                   | 41.0 <sup>ns</sup> | 69.2 <sup>ns</sup> | 88.5 <sup>ns</sup> |

1094 Percentages of root growth recovery of plate-grown, seven-day-old seedlings after  
 1095 transient exposure to 600 nM isoxaben for 24 hours. The top four sample rows list  
 1096 genotypes that are in *Ler* background. The bottom seven sample rows list genotypes  
 1097 that are in *Col* background.

1098 <sup>a</sup>Total number of samples. Cases per class and timepoint were pooled from three  
 1099 independent experiments. For each biological replicate  $22 \leq n \leq 32$  seedlings were  
 1100 analyzed per genotype and time point.

1101 <sup>b</sup>Statistical significance (mutant vs respective wild type): na, not applicable; ns, not  
 1102 significant; \*  $P < 0.05$ ; \*\*  $P < 0.005$ ; \*\*\*\*  $P < 0.0001$ ; (Fisher's exact test; two-sided).

1103

1104

1105 **Supporting information**

1106 **S1 Fig. *SUB* affects isoxaben-dependent induction of *CCR1* and *PDF1.2*.**

1107 **Table S1. Primers used in this study.**

1108
